# Supplementary material
Source: publisher figshare collection journal article supplement (https://gsapubs.figshare.com/ndownloader/files/23320109)
Supplement: Supplementary file 1 [file 23320109]

## Sheet: DR3a-Detrital
Table DR3a. U-Pb geochronologic analyses of detrital zircon ages.
							Isotope ratios						Apparent ages (Ma)
Analysis	U	206Pb	U/Th	206Pb*	±	207Pb*	±	206Pb*	±	error	206Pb*	±	207Pb*	±	206Pb*	±	Best age	±	Conc
	(ppm)	204Pb		207Pb*	(%)	235U*	(%)	238U	(%)	corr.	238U*	(Ma)	235U	(Ma)	207Pb*	(Ma)	(Ma)	(Ma)	(%)
Beartooth Quartite, Burro Mountains, New Mexico. (see Table 4 for location)
11BQ01-13	205.455	11796	2.84026	22.8716	14.6681	0.0933984	14.8344	0.015493	2.21528	0.149334	99.1082	2.17873	90.6642	12.8672			99.1082	2.17873	NA
11BQ01-21	94.8026	3227.58	1.27705	18.0213	24.499	0.119125	24.7603	0.0155699	3.58774	0.144899	99.5969	3.54581	114.278	26.7677			99.5969	3.54581	NA
11BQ01-32	546.966	18306.3	2.42307	22.0782	8.72061	0.0988769	8.817	0.0158328	1.30014	0.147459	101.265	1.3063	95.7391	8.05574			101.265	1.3063	NA
11BQ01-20	277.444	18654.6	0.804196	21.3209	14.2543	0.102724	14.46	0.0158846	2.43007	0.168055	101.594	2.44944	99.2874	13.6782			101.594	2.44944	NA
11BQ01-85	1309.39	43961	2.44218	20.8968	3.04238	0.104837	5.86138	0.0158889	5.00996	0.854741	101.621	5.05126	101.232	5.64743			101.621	5.05126	NA
11BQ01-98	84.5045	9474.8	0.607116	17.7179	23.1454	0.124588	23.4646	0.0160099	3.85722	0.164384	102.389	3.91817	119.223	26.4013			102.389	3.91817	NA
11BQ01-73	1003.55	43563.7	1.26337	20.8891	3.15396	0.105939	3.53932	0.0160499	1.60601	0.453763	102.643	1.6354	102.243	3.4425			102.643	1.6354	NA
11BQ01-28	433.494	12572.4	2.30329	20.3185	4.01519	0.10954	4.98451	0.0161422	2.95356	0.592549	103.228	3.02463	105.544	4.99671			103.228	3.02463	NA
11BQ01-17	670.408	50913.2	1.84593	21.1532	4.35869	0.114808	4.61321	0.0176135	1.51113	0.327567	112.555	1.6861	110.354	4.82399			112.555	1.6861	NA
11BQ01-80	481.245	14586.2	1.76338	20.7979	6.87826	0.118499	7.07934	0.0178744	1.67527	0.236642	114.208	1.89644	113.71	7.6157			114.208	1.89644	NA
11BQ01-31	400.83	29512.1	1.16965	20.9219	5.77992	0.168719	5.97625	0.0256015	1.51924	0.254212	162.961	2.44473	158.307	8.76041			162.961	2.44473	NA
11BQ01-82	430.681	51124.4	2.43503	20.8262	7.16727	0.17114	7.31935	0.02585	1.48425	0.202785	164.522	2.41103	160.408	10.8608			164.522	2.41103	NA
11BQ01-36	276.452	14835	1.75853	20.3033	4.34458	0.228995	5.2463	0.0337203	2.9408	0.560546	213.79	6.18403	209.369	9.92598			213.79	6.18403	NA
11BQ01-47	164.054	18374.5	1.70763	20.4018	11.4509	0.233342	11.5919	0.034527	1.80202	0.155456	218.819	3.877	212.954	22.2721			218.819	3.877	NA
11BQ01-01	655.826	82218.7	1.99372	19.9163	1.37718	0.244591	1.71318	0.0353304	1.01899	0.594795	223.823	2.24159	222.173	3.41859			223.823	2.24159	NA
11BQ01-24	245.589	17925.5	2.16125	19.7665	3.93808	0.247353	4.13885	0.0354606	1.27343	0.307678	224.634	2.8113	224.424	8.33388			224.634	2.8113	NA
11BQ01-46	143.534	5822.98	0.819838	18.7215	8.22096	0.262685	8.37009	0.0356676	1.57298	0.187928	225.923	3.49216	236.828	17.6825			225.923	3.49216	NA
11BQ01-97	529.347	30373.9	2.29674	18.9904	1.96947	0.319596	2.34742	0.0440183	1.27733	0.544142	277.692	3.47173	281.591	5.77278			277.692	3.47173	NA
11BQ01-34	705.164	98605.9	0.653435	19.2267	1.03365	0.347394	1.40454	0.0484424	0.950936	0.677046	304.952	2.83237	302.759	3.67699			304.952	2.83237	NA
11BQ01-45	388.285	49659.6	1.27276	18.7093	1.92032	0.384845	2.07362	0.0522207	0.782473	0.377346	328.141	2.50336	330.597	5.85126			328.141	2.50336	NA
11BQ01-44	371.563	11272	0.687431	18.3294	4.407	0.404497	6.0914	0.0537727	4.20518	0.690347	337.642	13.8331	344.904	17.815			337.642	13.8331	NA
11BQ01-02	160.697	18469.4	0.382921	18.4759	7.05221	0.419778	7.22389	0.0562502	1.56557	0.216721	352.78	5.37463	355.892	21.6903			352.78	5.37463	NA
11BQ01-95B	291.007	49579.5	0.527989	18.5597	4.49854	0.442122	4.60955	0.059513	1.00552	0.218138	372.663	3.64094	371.748	14.3502			372.663	3.64094	NA
11BQ01-65	645.067	79029.8	5.60068	18.5841	1.17141	0.445868	1.77351	0.0600961	1.33159	0.750821	376.21	4.86619	374.381	5.55322			376.21	4.86619	NA
11BQ01-63	454.715	101696	71.0784	18.0328	1.85148	0.486824	2.44987	0.0636697	1.60434	0.654868	397.905	6.19074	402.744	8.14508			397.905	6.19074	NA
11BQ01-76	555.968	80422	0.856995	18.2265	1.19441	0.494585	1.49733	0.0653797	0.902995	0.603069	408.26	3.57225	408.03	5.03121			408.26	3.57225	100.381
11BQ01-07	431.333	74811.7	2.05347	18.2922	2.58684	0.499753	2.77301	0.0663011	0.99893	0.360233	413.833	4.004	411.535	9.38274			413.833	4.004	103.809
11BQ01-52	270.662	126655	1.64249	18.2228	2.43581	0.508118	2.97426	0.067155	1.70677	0.573845	418.993	6.92378	417.183	10.1754			418.993	6.92378	102.905
11BQ01-39	479.778	85367.1	1.9635	17.9852	1.7584	0.531295	2.63255	0.0693027	1.95917	0.744211	431.954	8.18541	432.669	9.2746			431.954	8.18541	98.9684
11BQ01-74	468.596	66019.1	2.29558	17.7373	2.09746	0.557131	5.2297	0.071671	4.79067	0.916049	446.215	20.6537	449.658	19.0016			446.215	20.6537	95.4878
11BQ01-41	127.89	25866.1	1.19707	17.9816	4.89116	0.55958	5.9703	0.0729775	3.42361	0.57344	454.069	15.0107	451.253	21.7544			454.069	15.0107	103.928
11BQ01-37	119.73	20200.3	1.08866	17.6887	5.82942	0.57463	6.08191	0.0737197	1.73423	0.285146	458.527	7.6757	461.005	22.5399			458.527	7.6757	96.8599
11BQ01-72	250.595	45459	1.42247	17.8002	2.10675	0.577224	2.73714	0.074519	1.74744	0.638418	463.324	7.8122	462.676	10.1717			463.324	7.8122	100.843
11BQ01-16	233.613	9060.13	0.726462	14.1722	1.07127	1.48257	1.61633	0.152388	1.21034	0.748818	914.336	10.3176	923.281	9.8014	944.69	21.934	944.69	21.934	96.7869
11BQ01-83	104.405	34137.3	0.817458	14.0712	2.3466	1.59014	2.45255	0.16228	0.713075	0.290748	969.435	6.41813	966.35	15.2895	959.319	47.9603	959.319	47.9603	101.055
11BQ01-67	118.267	43961.5	2.46667	14.0257	1.05861	1.64135	1.37297	0.166965	0.874284	0.636785	995.365	8.06376	986.232	8.66315	965.98	21.6305	965.98	21.6305	103.042
11BQ01-50	112.716	42271.3	2.55206	13.8525	0.779563	1.67443	0.951013	0.168226	0.544709	0.572767	1002.33	5.05649	998.867	6.04584	991.278	15.8459	991.278	15.8459	101.115
11BQ01-56	128.928	55709.8	2.39222	13.7735	2.21524	1.7014	2.53156	0.169961	1.22535	0.484031	1011.9	11.4752	1009.06	16.1909	1002.88	44.9926	1002.88	44.9926	100.9
11BQ01-71	172.546	71614	2.18204	13.6316	0.836393	1.75724	2.06482	0.173731	1.88783	0.914286	1032.63	18.0132	1029.83	13.3627	1023.87	16.925	1023.87	16.925	100.856
11BQ01-68	54.7876	20720.8	3.71738	13.5928	3.59178	1.73194	4.05673	0.170742	1.88579	0.464854	1016.2	17.7293	1020.47	26.1194	1029.64	72.6433	1029.64	72.6433	98.6947
11BQ01-69	96.5731	40663.6	2.72406	13.5324	1.44318	1.79869	1.8957	0.176534	1.22919	0.64841	1048.01	11.8895	1044.98	12.3715	1038.64	29.158	1038.64	29.158	100.903
11BQ01-96	287.642	659063	4.25469	13.5318	0.88846	1.77848	1.164	0.174544	0.752021	0.646066	1037.1	7.20415	1037.62	7.56541	1038.72	17.9562	1038.72	17.9562	99.844
11BQ01-11	82.287	45472	2.80035	13.3866	3.4405	1.85821	3.59198	0.180412	1.03212	0.287341	1069.22	10.1691	1066.35	23.7161	1060.5	69.2589	1060.5	69.2589	100.822
11BQ01-29	204.714	258797	2.73968	13.379	1.38236	1.83365	1.60522	0.177926	0.815974	0.508325	1055.63	7.9454	1057.59	10.5475	1061.64	27.833	1061.64	27.833	99.4337
11BQ01-62	147.663	60716.7	2.72468	13.3759	1.82422	1.79581	1.93332	0.174214	0.640277	0.33118	1035.29	6.12383	1043.94	12.6099	1062.11	36.7129	1062.11	36.7129	97.475
11BQ01-84	302.364	200709	1.59283	13.3183	0.546136	1.84912	1.72985	0.178613	1.64138	0.948855	1059.39	16.035	1063.12	11.4002	1070.78	10.9731	1070.78	10.9731	98.9363
11BQ01-79	117.909	58908.2	1.36477	13.2498	2.41959	1.96427	2.94446	0.18876	1.67793	0.56986	1114.65	17.1755	1103.35	19.8141	1081.1	48.5642	1081.1	48.5642	103.103
11BQ01-65	50.4219	23565.5	1.13798	13.2231	3.30687	1.86679	3.46498	0.179031	1.03475	0.298631	1061.68	10.1288	1069.4	22.9142	1085.17	66.3188	1085.17	66.3188	97.8354
11BQ01-61	34.0788	27122.3	1.25349	13.0361	6.13236	1.83055	6.32139	0.173072	1.53435	0.242723	1029.02	14.593	1056.48	41.5332	1113.64	122.55	1113.64	122.55	92.4009
11BQ01-93	225.845	58448.3	1.32213	13.0191	0.780256	1.87915	1.7315	0.177436	1.54574	0.892714	1052.95	15.0162	1073.76	11.4754	1116.28	15.5737	1116.28	15.5737	94.3271
11BQ01-10	54.7807	55019.4	1.85976	12.9807	3.85461	1.85667	4.07422	0.174796	1.31955	0.323878	1038.48	12.6565	1065.8	26.8937	1122.14	76.8669	1122.14	76.8669	92.5451
11BQ01-08	129.017	62016.6	5.54071	12.8309	1.32413	2.04137	1.46761	0.189966	0.63291	0.431251	1121.19	6.51331	1129.42	10.0025	1145.29	26.313	1145.29	26.313	97.8961
11BQ01-59	82.9254	40952	1.65799	12.7172	1.71135	2.14857	1.95962	0.19817	0.954658	0.487165	1165.48	10.1786	1164.59	13.5789	1162.91	33.9281	1162.91	33.9281	100.221
11BQ01-75	393.498	177326	2.86073	12.7072	0.469753	2.122	0.997186	0.195566	0.879609	0.882091	1151.46	9.27531	1155.99	6.88216	1164.47	9.32673	1164.47	9.32673	98.8829
11BQ01-14	1387.77	856941	4.12191	12.6315	0.120342	2.19784	0.780754	0.201348	0.771423	0.98805	1182.56	8.33471	1180.36	5.44863	1176.34	2.38096	1176.34	2.38096	100.529
11BQ01-12	624.837	27800.4	15.7353	12.6313	0.258619	2.01335	0.92095	0.184445	0.883892	0.959761	1091.21	8.87296	1120.02	6.248	1176.37	5.11594	1176.37	5.11594	92.7612
11BQ01-40	136.782	50803.2	3.08486	12.5869	1.68221	2.1865	2.05531	0.199603	1.18087	0.574548	1173.19	12.6664	1176.75	14.3209	1183.32	33.2613	1183.32	33.2613	99.1435
11BQ01-33	236.733	67676.7	2.43581	12.4964	0.686307	2.24041	2.08458	0.203053	1.96836	0.94425	1191.7	21.4166	1193.78	14.6354	1197.58	13.5262	1197.58	13.5262	99.509
11BQ01-23	212.524	13303	2.53077	12.347	2.37586	2.23729	2.67828	0.200347	1.23632	0.461609	1177.18	13.3023	1192.81	18.7965	1221.23	46.6815	1221.23	46.6815	96.3938
11BQ01-99	45.6274	63361.1	2.08615	12.3361	1.71742	2.21124	2.28431	0.19784	1.50617	0.659353	1163.7	16.0364	1184.6	15.9729	1222.95	33.7466	1222.95	33.7466	95.1556
11BQ01-94	152.158	63418.1	2.57537	12.3221	1.21482	2.34791	1.67436	0.209829	1.15226	0.688179	1227.91	12.8828	1226.93	11.9236	1225.18	23.8633	1225.18	23.8633	100.223
11BQ01-06	25.3391	14792.5	1.44595	12.2797	7.45814	2.16594	7.58209	0.192901	1.36536	0.180077	1137.07	14.233	1170.18	52.7172	1231.98	146.543	1231.98	146.543	92.2964
11BQ01-43	61.0511	17054.7	2.04924	11.7441	2.43508	2.77674	2.61713	0.236512	0.959033	0.366445	1368.54	11.8251	1349.3	19.5401	1318.93	47.1957	1318.93	47.1957	103.761
11BQ01-22	137.256	148291	2.4194	11.6605	1.02158	2.73991	1.29709	0.231714	0.799256	0.616191	1343.48	9.69275	1339.35	9.64914	1332.75	19.7624	1332.75	19.7624	100.805
11BQ01-64	175.644	93951.1	1.06254	11.2717	1.18108	2.65552	6.66956	0.21709	6.56415	0.984195	1266.48	75.4802	1316.18	49.2343	1398.05	22.6415	1398.05	22.6415	90.5889
11BQ01-81	321.165	42707.3	2.4134	11.0945	0.255227	2.89584	1.04388	0.233012	1.0122	0.96965	1350.27	12.3309	1380.83	7.87882	1428.37	4.87246	1428.37	4.87246	94.5318
11BQ01-57	622.72	783724	3.83032	10.9615	0.256594	3.16554	1.07391	0.251662	1.04281	0.971036	1447.04	13.5162	1448.79	8.28676	1451.35	4.88338	1451.35	4.88338	99.7032
11BQ01-05	30.604	12715	2.38532	10.935	3.01334	3.1658	3.27908	0.251073	1.29311	0.394351	1444.01	16.7291	1448.86	25.308	1455.97	57.3254	1455.97	57.3254	99.1787
11BQ01-03	441.853	504894	1.72195	10.8429	0.338103	3.21798	0.869752	0.253062	0.801346	0.92135	1454.25	10.4326	1461.5	6.73769	1472.04	6.41674	1472.04	6.41674	98.7915
11BQ01-54	258.014	130441	3.29645	10.815	0.337448	3.33714	1.34352	0.261757	1.30046	0.967944	1498.82	17.3915	1489.78	10.4969	1476.92	6.40012	1476.92	6.40012	101.483
11BQ01-49	135.475	109735	3.6749	10.6088	1.19041	3.47546	2.04643	0.267409	1.66457	0.813402	1527.64	22.6403	1521.66	16.1376	1513.34	22.4674	1513.34	22.4674	100.944
11BQ01-42	110.588	79374.3	1.63371	10.0972	0.671699	3.82995	1.87865	0.280474	1.75446	0.933896	1593.75	24.7734	1599.06	15.1272	1606.06	12.5246	1606.06	12.5246	99.2336
11BQ01-48	69.0256	63542.3	1.23727	9.93256	1.18584	4.1445	1.78951	0.29856	1.3402	0.748921	1684.16	19.8637	1663.12	14.6394	1636.64	22.0231	1636.64	22.0231	102.904
11BQ01-92	98.5283	200869	0.984006	9.85972	0.948916	4.14496	1.57088	0.296404	1.25189	0.796934	1673.45	18.4514	1663.22	12.8509	1650.3	17.5915	1650.3	17.5915	101.403
11BQ01-35	295.303	216770	2.50796	9.6177	0.327432	4.34106	1.06472	0.302807	1.01312	0.951539	1705.21	15.1798	1701.2	8.78707	1696.24	6.03517	1696.24	6.03517	100.529
11BQ01-77	317.484	40852.1	1.87866	9.40487	0.292943	4.28546	1.75337	0.292314	1.72872	0.985944	1653.08	25.2073	1690.57	14.436	1737.38	5.36983	1737.38	5.36983	95.1481
11BQ01-78	66.9327	70157.7	1.00157	9.40201	1.01611	4.55291	1.35016	0.310462	0.889078	0.658498	1742.98	13.5782	1740.69	11.2409	1737.93	18.6296	1737.93	18.6296	100.29
11BQ01-38	294.306	290113	3.84668	9.35427	0.345404	4.70827	2.39243	0.319426	2.36736	0.989523	1786.92	36.9465	1768.71	20.0393	1747.26	6.32406	1747.26	6.32406	102.27
11BQ01-91	546.885	259545	3.73647	9.14201	0.328657	4.83065	1.16817	0.320292	1.12098	0.959607	1791.15	17.5305	1790.25	9.82737	1789.18	5.98794	1789.18	5.98794	100.11
11BQ01-25	165.597	662681	3.44768	9.13428	0.507819	4.93285	0.902081	0.326792	0.745567	0.826497	1822.81	11.8379	1807.89	7.61585	1790.72	9.25044	1790.72	9.25044	101.792
11BQ01-09	230.236	33693.3	2.60574	8.91763	0.871441	5.10964	1.28538	0.330475	0.944872	0.735094	1840.68	15.1295	1837.71	10.9157	1834.33	15.7898	1834.33	15.7898	100.347
11BQ01-15	50.7112	38945.6	0.87748	8.64972	1.24992	5.52336	2.13512	0.346501	1.73102	0.810736	1917.87	28.7157	1904.24	18.3582	1889.41	22.4962	1889.41	22.4962	101.506
11BQ01-30	125.157	129316	1.25613	8.2286	0.265611	5.88627	1.72366	0.351289	1.70307	0.988056	1940.75	28.541	1959.21	14.9613	1978.75	4.73051	1978.75	4.73051	98.0795
11BQ01-55	316.637	149040	1.21246	7.68215	0.200437	6.75167	1.4075	0.376177	1.39316	0.989808	2058.4	24.5493	2079.41	12.4485	2100.27	3.52039	2100.27	3.52039	98.0066
11BQ01-87	109.756	137648	1.41561	7.31023	0.549881	7.46323	1.49174	0.395691	1.3867	0.929581	2149.17	25.3436	2168.59	13.3579	2186.99	9.56308	2186.99	9.56308	98.2704
11BQ01-86	217.799	239711	39.3586	5.08983	1.48352	14.3501	4.65994	0.529733	4.41749	0.947972	2740.33	98.6209	2773.14	44.2618	2797.08	24.2776	2797.08	24.2776	97.9708
Mojado Formation, Little Hatchet Mountains, New Mexico. (see Table 4 for location)
11BQ17-37	118.896	3589.94	1.89672	37.1365	38.2364	0.0576779	39.1381	0.0155349	8.3531	0.213426	99.3746	8.23721	56.9384	21.6746			99.3746	8.23721	NA
11BQ17-14	114.276	5985.54	2.20464	19.6853	33.6538	0.109373	33.8817	0.0156154	3.92397	0.115814	99.8852	3.88925	105.392	33.9305			99.8852	3.88925	NA
11BQ17-29	363.609	17256.7	3.79357	20.308	12.7914	0.106393	12.9472	0.0156703	2.00251	0.154667	100.234	1.99167	102.66	12.6425			100.234	1.99167	NA
11BQ17-03	334.869	18893.2	3.93276	21.1312	9.41469	0.102425	9.62575	0.0156974	2.00468	0.208262	100.406	1.99722	99.0123	9.08098			100.406	1.99722	NA
11BQ17-04	898.872	18178.9	2.73511	20.3231	2.44021	0.10663	2.84833	0.0157169	1.46912	0.515784	100.53	1.46545	102.878	2.78674			100.53	1.46545	NA
11BQ17-15	114.609	6810.01	1.18774	21.5593	19.7973	0.100592	20.8777	0.0157289	6.62911	0.317522	100.606	6.61749	97.323	19.3777			100.606	6.61749	NA
11BQ17-09	445.678	11067.3	1.78997	22.0568	5.02198	0.0998109	5.15325	0.0159669	1.15574	0.224273	102.116	1.17089	96.6018	4.7487			102.116	1.17089	NA
11BQ17-43	599.88	27209.3	1.83912	21.1871	3.97459	0.105397	4.5631	0.0161956	2.24155	0.491235	103.567	2.30296	101.746	4.41775			103.567	2.30296	NA
11BQ17-32	284.284	10247.3	2.51153	21.2865	12.2522	0.105404	12.6214	0.0162727	3.03031	0.240094	104.056	3.12791	101.752	12.2206			104.056	3.12791	NA
11BQ17-34	892.756	35645.5	3.48768	20.6659	3.94803	0.109114	5.3977	0.0163543	3.68078	0.681918	104.574	3.81809	105.154	5.39194			104.574	3.81809	NA
11BQ17-31	2291.02	172451	2.34275	20.7957	2.10397	0.111132	2.2506	0.0167615	0.79909	0.355056	107.156	0.849193	107.001	2.28562			107.156	0.849193	NA
11BQ17-07	896.462	4137.01	2.83653	20.3157	7.22882	0.113978	7.5663	0.0167939	2.23451	0.295324	107.361	2.37913	109.598	7.86078			107.361	2.37913	NA
11BQ17-01	584.285	34555.4	4.10851	21.9326	5.70986	0.106433	5.765	0.0169302	0.795421	0.137974	108.226	0.853664	102.697	5.63097			108.226	0.853664	NA
11BQ17-44	96.6957	5579.77	2.2392	26.9464	38.2052	0.0867384	38.5132	0.0169516	4.86093	0.126214	108.361	5.22332	84.4605	31.2222			108.361	5.22332	NA
11BQ17-33	513.534	24525	2.01951	20.0369	7.09651	0.11844	7.26367	0.0172118	1.54934	0.2133	110.01	1.68997	113.657	7.81051			110.01	1.68997	NA
11BQ17-40	174.459	10296.6	0.466298	20.0892	12.4815	0.167866	12.8917	0.0244582	3.22646	0.250273	155.771	4.96564	157.566	18.8175			155.771	4.96564	NA
11BQ17-35	1557.59	63898.4	0.564695	20.2519	1.24984	0.171937	1.62439	0.0252542	1.03755	0.638736	160.777	1.64752	161.098	2.41983			160.777	1.64752	NA
11BQ17-06	179.318	7181.83	0.846213	21.4919	11.2151	0.163305	11.5262	0.0254549	2.65959	0.230743	162.039	4.25586	153.592	16.4308			162.039	4.25586	NA
11BQ17-18	409.609	20789.4	0.918105	20.7957	6.29118	0.170759	7.0227	0.0257547	3.1208	0.444388	163.924	5.05124	160.077	10.4008			163.924	5.05124	NA
11BQ17-48	663.668	43441.9	0.81524	20.3306	2.84391	0.17471	3.79005	0.0257613	2.50533	0.661028	163.965	4.05606	163.499	5.72358			163.965	4.05606	NA
11BQ17-19	586.111	7951.76	1.29191	19.2991	4.34598	0.184821	4.62326	0.0258694	1.57702	0.341106	164.645	2.5636	172.2	7.32291			164.645	2.5636	NA
11BQ17-11	526.03	26706	1.18612	20.1004	5.40057	0.179267	5.57682	0.0261339	1.39098	0.249421	166.306	2.2837	167.43	8.60826			166.306	2.2837	NA
11BQ17-23	469.522	24437.4	1.38326	19.8569	4.73106	0.18197	5.17751	0.0262065	2.10326	0.406229	166.763	3.46247	169.754	8.09382			166.763	3.46247	NA
11BQ17-38	130.101	8222.97	0.660968	21.5526	10.4172	0.168184	10.7462	0.0262896	2.63845	0.245524	167.284	4.35693	157.842	15.7106			167.284	4.35693	NA
11BQ17-10	163.524	8162.64	1.29096	20.2402	11.3993	0.179316	11.6542	0.0263228	2.4241	0.208002	167.493	4.0079	167.472	17.9948			167.493	4.0079	NA
11BQ17-27	560.092	12209.5	0.486566	19.7534	2.37312	0.183815	3.199	0.0263344	2.1452	0.670585	167.565	3.5483	171.338	5.04366			167.565	3.5483	NA
11BQ17-12	206.543	15251.7	1.16289	21.2501	8.87851	0.171012	10.1857	0.0263564	4.99202	0.490101	167.704	8.26386	160.297	15.1049			167.704	8.26386	NA
11BQ17-25	504.129	31386.9	0.693615	20.1459	3.99826	0.18358	4.30082	0.0268233	1.5846	0.368441	170.636	2.66842	171.137	6.77354			170.636	2.66842	NA
11BQ17-24	489.049	38517.6	3.93538	19.9168	2.49973	0.274755	2.78358	0.0396885	1.22462	0.439943	250.902	3.01356	246.488	6.09197			250.902	3.01356	NA
11BQ17-08	375.14	31180.1	2.69123	19.3198	2.62771	0.303871	2.9968	0.0425784	1.44081	0.480782	268.795	3.79319	269.419	7.09167			268.795	3.79319	NA
11BQ17-17	96.0514	12744.6	2.31479	19.57	14.4136	0.302816	15.0819	0.0429802	4.43974	0.294376	271.279	11.7942	268.597	35.6089			271.279	11.7942	NA
11BQ17-16	612.736	88506.1	1.60679	19.7722	2.08519	0.30481	2.28584	0.04371	0.936526	0.409707	275.789	2.52836	270.15	5.42203			275.789	2.52836	NA
11BQ17-39	58.5129	48611.5	2.05529	12.6673	2.72162	2.20927	3.04094	0.202971	1.35651	0.446083	1191.26	14.7544	1183.98	21.2591	1170.73	53.8732	1170.73	53.8732	101.753
11BQ17-13	108.207	88095.1	0.547876	10.6836	1.05919	3.33529	1.82319	0.258434	1.48396	0.813937	1481.82	19.6454	1489.35	14.2431	1500.07	20.0256	1500.07	20.0256	98.7835
11BQ17-36	43.0316	24423.3	1.64022	9.72524	1.48661	4.24012	2.04676	0.299073	1.40685	0.687354	1686.71	20.879	1681.82	16.8179	1675.72	27.4704	1675.72	27.4704	100.656
11BQ17-50	61.2241	52711.4	1.65328	9.692	1.20336	4.28839	2.26138	0.301444	1.91461	0.846659	1698.47	28.588	1691.14	18.6218	1682.04	22.2175	1682.04	22.2175	100.977
11BQ17-20	212.483	171275	2.53775	9.6607	0.490796	4.18972	0.815684	0.293557	0.651505	0.798723	1659.28	9.5311	1672.01	6.68651	1688.01	9.05576	1688.01	9.05576	98.2978
11BQ17-42	123.314	134114	1.6085	9.6566	0.51941	4.24585	3.2359	0.297363	3.19394	0.987033	1678.22	47.1931	1682.93	26.5995	1688.8	9.58276	1688.8	9.58276	99.3737
11BQ17-47	262.236	194004	2.10663	9.43162	0.43999	4.50325	2.02416	0.308043	1.97576	0.976089	1731.07	29.9948	1731.57	16.8198	1732.16	8.07327	1732.16	8.07327	99.9368
11BQ17-22	465.335	117009	3.86227	9.41641	0.17958	4.65989	1.62656	0.318244	1.61661	0.993887	1781.15	25.1588	1760.07	13.5986	1735.13	3.29383	1735.13	3.29383	102.652
11BQ17-02	1017.34	238249	1.79087	9.39893	0.0929674	4.54035	1.10717	0.309504	1.10326	0.996468	1738.27	16.8095	1738.39	9.21313	1738.53	1.70446	1738.53	1.70446	99.9847
11BQ17-46	338.278	327257	1.30737	9.3842	0.336175	4.64556	1.53698	0.31618	1.49976	0.975787	1771.05	23.2253	1757.5	12.8425	1741.41	6.15949	1741.41	6.15949	101.702
11BQ17-26	437.307	97651.4	3.29897	9.19623	0.256186	4.57446	0.884838	0.305104	0.84694	0.957169	1716.57	12.7636	1744.63	7.3729	1778.4	4.67191	1778.4	4.67191	96.5231
11BQ17-28	119.34	135267	2.14166	8.88799	0.773989	5.05744	1.78171	0.326011	1.60481	0.900716	1819.02	25.4349	1829	15.1057	1840.36	14.0118	1840.36	14.0118	98.8406
11BQ17-30	160.647	173435	4.38295	4.96529	0.373382	13.5835	1.76836	0.489165	1.72849	0.977455	2567.06	36.6017	2721.12	16.7259	2837.54	6.08515	2837.54	6.08515	90.4677
Mojado Formation, Little Hatchet Mountains, New Mexico. (see Table 4 for location)
11BQ19-32	376.687	15590.9	2.06041	21.3624	16.2975	0.095938	16.4347	0.0148641	2.11955	0.128968	95.1152	2.00122	93.0199	14.6092			95.1152	2.00122	NA
11BQ19-29	247.182	9444.39	2.54088	20.1527	18.5794	0.10241	19.1597	0.0149684	4.67964	0.244244	95.7773	4.44891	98.9986	18.0744			95.7773	4.44891	NA
11BQ19-12	271.198	7047.12	2.00914	21.05	11.1676	0.0984027	11.356	0.015023	2.06042	0.181438	96.1244	1.96588	95.3009	10.3304			96.1244	1.96588	NA
11BQ19-70	287.02	11504.4	2.05988	23.4416	9.86986	0.0886368	10.2951	0.0150696	2.92846	0.284451	96.42	2.80261	86.2327	8.51145			96.42	2.80261	NA
11BQ19-42	236.157	5787.89	1.74464	25.2835	26.6031	0.0823279	26.7415	0.0150967	2.71779	0.101632	96.5925	2.60561	80.3312	20.6568			96.5925	2.60561	NA
11BQ19-10	147.903	3319.46	3.17746	31.7485	31.0014	0.0660239	31.3845	0.0152028	4.88909	0.15578	97.2659	4.71972	64.9193	19.7394			97.2659	4.71972	NA
11BQ19-14	277.599	27007.7	2.41985	21.8057	12.6629	0.0962029	13.1826	0.0152145	3.66481	0.278004	97.3402	3.54053	93.2653	11.7475			97.3402	3.54053	NA
11BQ19-69	432.406	33188.3	3.01986	20.4242	17.5132	0.103268	17.9161	0.0152971	3.77792	0.210868	97.8651	3.66934	99.7888	17.0294			97.8651	3.66934	NA
11BQ19-03	247.84	7614.3	2.37037	25.5588	15.9197	0.082641	16.0346	0.0153192	1.91606	0.119496	98.0049	1.86363	80.6249	12.4285			98.0049	1.86363	NA
11BQ19-60	153.002	6462.31	2.58774	28.2007	30.4939	0.0750482	30.7065	0.0153497	3.60725	0.117475	98.1985	3.51542	73.4787	21.769			98.1985	3.51542	NA
11BQ19-36	194.287	9151.86	2.87988	21.254	15.1532	0.0999006	15.5661	0.0153995	3.56146	0.228796	98.5152	3.48191	96.6846	14.3566			98.5152	3.48191	NA
11BQ19-19	207.219	7973.89	2.11226	23.4387	22.1272	0.0911514	23.4634	0.0154951	7.80497	0.332645	99.1219	7.67726	88.5754	19.9046			99.1219	7.67726	NA
11BQ19-23	202.471	5117.03	2.26322	23.1817	21.0836	0.0922109	21.2485	0.0155034	2.64256	0.124364	99.1744	2.60069	89.5608	18.2172			99.1744	2.60069	NA
11BQ19-11	200.575	4999.45	2.23466	23.8672	24.131	0.0897236	24.6155	0.0155313	4.86001	0.197437	99.3515	4.79147	87.2459	20.5821			99.3515	4.79147	NA
11BQ19-41	376.143	12179.2	3.64374	20.3988	6.81464	0.104988	7.27478	0.0155325	2.54619	0.350002	99.3591	2.51047	101.37	7.01838			99.3591	2.51047	NA
11BQ19-65	349.918	9889.01	1.90164	21.5219	9.94651	0.0995531	10.8452	0.0155394	4.32276	0.398586	99.4032	4.26401	96.3638	9.97061			99.4032	4.26401	NA
11BQ19-07	336.66	13757	2.566	21.7344	8.47145	0.0990245	8.76768	0.0156095	2.25983	0.257745	99.8479	2.239	95.8754	8.02156			99.8479	2.239	NA
11BQ19-33	273.187	9339.35	1.74396	23.291	13.3937	0.0924376	13.7856	0.0156147	3.26345	0.236729	99.8813	3.23445	89.7716	11.8448			99.8813	3.23445	NA
11BQ19-54	359.416	10863.7	2.25894	21.3507	8.61633	0.101152	9.09397	0.0156633	2.90847	0.319824	100.19	2.89146	97.839	8.48242			100.19	2.89146	NA
11BQ19-55	201.342	3870.12	2.30346	22.8402	26.7349	0.0946033	26.9463	0.0156713	3.36836	0.125003	100.24	3.35033	91.7826	23.6514			100.24	3.35033	NA
11BQ19-18	244.672	8121.07	2.68359	21.8889	16.4908	0.0987286	17.0802	0.0156735	4.44809	0.260424	100.254	4.4249	95.6021	15.5851			100.254	4.4249	NA
11BQ19-21	735.006	26670.2	2.5691	20.9179	5.74801	0.103358	6.2017	0.0156805	2.32842	0.375448	100.299	2.3173	99.8712	5.89893			100.299	2.3173	NA
11BQ19-52	171.708	5633.98	2.81598	20.5863	13.7506	0.10503	13.9168	0.0156816	2.14446	0.154092	100.306	2.13437	101.409	13.4318			100.306	2.13437	NA
11BQ19-13	425.054	24325.9	2.46602	21.1257	6.21916	0.102349	6.56037	0.0156817	2.08818	0.318302	100.306	2.07836	98.9424	6.18484			100.306	2.07836	NA
11BQ19-35	735.971	29448.9	7.82212	21.1298	6.56853	0.102447	6.69498	0.0156998	1.29504	0.193435	100.421	1.29042	99.0328	6.31724			100.421	1.29042	NA
11BQ19-02	191.199	4834.27	2.27548	24.5077	14.8083	0.088628	15.1508	0.0157533	3.2037	0.211453	100.761	3.20298	86.2245	12.5251			100.761	3.20298	NA
11BQ19-34	262.084	7726.44	3.20285	21.8585	12.2453	0.0994343	12.8991	0.0157636	4.05438	0.314316	100.826	4.05607	96.2541	11.8461			100.826	4.05607	NA
11BQ19-16	251.664	12027.2	2.432	21.092	12.1241	0.105214	13.0207	0.016095	4.74811	0.36466	102.929	4.84838	101.578	12.5868			102.929	4.84838	NA
11BQ19-64	1217.99	47901.7	2.01124	21.1352	2.83338	0.107336	3.91502	0.0164533	2.70173	0.690093	105.202	2.81919	103.526	3.8533			105.202	2.81919	NA
11BQ19-74	348.961	11727.2	0.461584	21.2282	3.94855	0.169095	4.72216	0.0260341	2.58994	0.548464	165.679	4.23631	158.633	6.93518			165.679	4.23631	NA
11BQ19-53	299.215	25099.1	1.34089	21.3931	9.72058	0.171408	10.1925	0.0265952	3.06541	0.300752	169.203	5.1193	160.64	15.1448			169.203	5.1193	NA
11BQ19-71	202.076	22118.1	1.3957	21.8773	6.04746	0.168997	6.95346	0.0268147	3.43202	0.493571	170.581	5.77762	158.548	10.2073			170.581	5.77762	NA
11BQ19-72	130.87	10067.1	1.86593	23.1109	20.1503	0.162972	20.3706	0.0273167	2.98756	0.146661	173.733	5.12106	153.301	28.9931			173.733	5.12106	NA
11BQ19-51	343.466	31734.7	3.04782	20.3224	10.1852	0.201306	10.5336	0.0296708	2.68669	0.255059	188.488	4.99075	186.23	17.9247			188.488	4.99075	NA
11BQ19-01	258.838	14649.8	2.5987	19.4215	6.18559	0.21078	6.49521	0.02969	1.98148	0.305068	188.608	3.68308	194.207	11.4817			188.608	3.68308	NA
11BQ19-06	351.393	14412.9	2.05313	20.6934	6.02657	0.198612	6.47726	0.0298083	2.37389	0.366496	189.348	4.42955	183.951	10.8985			189.348	4.42955	NA
11BQ19-46	168.108	10913	3.07938	19.1315	9.56804	0.218206	9.85909	0.0302772	2.37784	0.241183	192.283	4.50467	200.416	17.9332			192.283	4.50467	NA
11BQ19-22	126.03	11184.6	1.99113	21.346	9.59438	0.28327	10.5182	0.0438547	4.31047	0.409811	276.682	11.674	253.248	23.5793			276.682	11.674	NA
11BQ19-15	109.292	12626.8	1.87885	16.1415	11.4265	0.41292	11.6946	0.0483402	2.48999	0.212917	304.324	7.40154	350.976	34.7164			304.324	7.40154	NA
11BQ19-09	260.211	56613.9	0.847756	18.039	4.8213	0.516356	4.9507	0.0675554	1.12451	0.227141	421.411	4.58723	422.714	17.1193			421.411	4.58723	98.0465
11BQ19-20	261.617	78827.5	1.12422	16.8281	1.77786	0.752921	3.67876	0.0918931	3.22064	0.875467	566.724	17.4729	569.918	16.0456	582.668	38.6001	566.724	17.4729	97.2635
11BQ19-05	402.203	133042	2.51751	16.4753	1.62673	0.827988	2.13521	0.0989367	1.38306	0.647741	608.174	8.02686	612.495	9.82053	628.484	35.0345	608.174	8.02686	96.7684
11BQ19-43	83.968	28871.3	1.87576	14.0226	4.2474	1.56774	4.43843	0.159442	1.2881	0.290215	953.674	11.4188	957.534	27.5225	966.393	86.7584	966.393	86.7584	98.6838
11BQ19-66	247.559	55503.4	1.14752	13.8156	0.972902	1.66101	1.50086	0.166434	1.14282	0.761446	992.432	10.5119	993.76	9.51281	996.699	19.764	996.699	19.764	99.5719
11BQ19-48	132.455	53279.8	12.6043	13.3404	1.02497	1.86494	1.95435	0.18044	1.66401	0.851439	1069.38	16.397	1068.74	12.9183	1067.45	20.5977	1067.45	20.5977	100.181
11BQ19-25	625.761	188505	1.41263	13.2608	0.470684	1.86749	0.975523	0.179608	0.85446	0.875899	1064.83	8.38685	1069.64	6.45105	1079.46	9.4376	1079.46	9.4376	98.645
11BQ19-28	138.512	58456.9	0.935289	13.2353	2.40554	1.87704	3.57148	0.18018	2.63986	0.739149	1067.96	25.9812	1073.02	23.6638	1083.29	48.2566	1083.29	48.2566	98.5844
11BQ19-37	328.579	401958	1.65606	13.1667	0.601153	1.88891	2.81936	0.180379	2.75453	0.977004	1069.05	27.1352	1077.2	18.7201	1093.76	12.0496	1093.76	12.0496	97.7409
11BQ19-27	97.6448	130546	2.2938	12.8583	2.23888	2.05168	3.38606	0.191335	2.54024	0.750206	1128.6	26.3	1132.86	23.1191	1141.03	44.5417	1141.03	44.5417	98.9103
11BQ19-47	218.9	136406	1.8266	12.7553	0.708382	2.1136	2.50303	0.19553	2.4007	0.959117	1151.26	25.3111	1153.25	17.2543	1156.98	14.0526	1156.98	14.0526	99.5057
11BQ19-17	84.379	48640.4	1.93315	11.5532	2.55545	2.70663	2.92294	0.226793	1.41888	0.48543	1317.67	16.9093	1330.28	21.6753	1350.61	49.3186	1350.61	49.3186	97.5609
11BQ19-26	566.221	369609	4.04208	10.8756	0.216761	3.23098	1.3345	0.254852	1.31677	0.98672	1463.45	17.2396	1464.62	10.348	1466.31	4.117	1466.31	4.117	99.8053
11BQ19-40	48.2035	22930.9	0.960335	10.5707	2.28349	3.34684	2.8483	0.25659	1.70249	0.597721	1472.37	22.4104	1492.05	22.2714	1520.12	43.0644	1520.12	43.0644	96.859
11BQ19-08	623.529	372427	4.83951	9.97074	0.173444	3.87308	1.80462	0.280081	1.79627	0.995371	1591.77	25.336	1608.09	14.5646	1629.51	3.22425	1629.51	3.22425	97.6837
11BQ19-57	46.7192	40948.6	1.78296	9.88032	1.70357	4.06901	2.3278	0.29158	1.58635	0.681481	1649.42	23.0864	1648.11	18.9754	1646.43	31.5987	1646.43	31.5987	100.182
11BQ19-62	143.792	98262.2	2.59507	9.74803	0.934489	4.34795	2.44404	0.307397	2.25833	0.924016	1727.88	34.2296	1702.51	20.1786	1671.39	17.2775	1671.39	17.2775	103.38
11BQ19-63	115.055	101608	1.99017	9.72601	0.938601	4.21914	2.8182	0.297617	2.65731	0.942909	1679.48	39.2895	1677.75	23.1367	1675.57	17.3443	1675.57	17.3443	100.233
11BQ19-38	1011.58	402710	3.74629	9.69654	0.0880435	4.02385	1.37774	0.282981	1.37493	0.997956	1606.36	19.5495	1639.03	11.2052	1681.18	1.62591	1681.18	1.62591	95.5496
11BQ19-44	257.049	164881	3.06268	9.68965	0.282429	4.34036	1.61742	0.305023	1.59257	0.984636	1716.17	23.9956	1701.06	13.3485	1682.49	5.21479	1682.49	5.21479	102.002
11BQ19-45	138.067	58058.8	1.44191	9.683	0.398164	4.33068	1.50724	0.304134	1.4537	0.964477	1711.77	21.8543	1699.22	12.4339	1683.76	7.35055	1683.76	7.35055	101.664
11BQ19-24	175.326	119176	1.62973	9.45503	0.42807	4.53819	2.91747	0.311204	2.88589	0.989177	1746.63	44.155	1738	24.2792	1727.62	7.85903	1727.62	7.85903	101.1
11BQ19-73	168.595	111131	2.3279	9.39006	0.489406	4.57224	1.1093	0.311383	0.995506	0.897417	1747.51	15.238	1744.22	9.24252	1740.26	8.96916	1740.26	8.96916	100.416
11BQ19-68	193.11	144906	3.91728	9.34859	0.578311	4.57081	1.15967	0.309912	1.00518	0.866783	1740.27	15.3306	1743.96	9.66168	1748.37	10.5882	1748.37	10.5882	99.5369
11BQ19-61	141.905	130883	7.7932	9.33754	0.537082	4.58663	1.36291	0.310617	1.25262	0.91908	1743.74	19.1376	1746.84	11.3621	1750.54	9.83052	1750.54	9.83052	99.6118
11BQ19-59	180.544	129406	3.4341	9.31745	0.619027	4.66997	1.08529	0.315581	0.891442	0.821383	1768.11	13.7849	1761.88	9.07659	1754.48	11.3269	1754.48	11.3269	100.777
11BQ19-67	79.4191	52212.3	0.67806	9.1438	0.958622	4.69139	4.29964	0.311119	4.19141	0.974829	1746.21	64.1177	1765.7	36.0021	1788.82	17.4648	1788.82	17.4648	97.618
11BQ19-04	96.5716	107546	2.32769	9.12302	0.999347	4.86597	1.45407	0.321964	1.05623	0.726396	1799.31	16.5831	1796.38	12.248	1792.97	18.1975	1792.97	18.1975	100.354
11BQ19-75	333.023	225506	4.21773	8.44912	0.306958	5.76999	2.24894	0.353578	2.2279	0.990641	1951.66	37.5163	1941.92	19.4647	1931.53	5.49535	1931.53	5.49535	101.042
11BQ19-49	29.7533	26565.2	0.754945	5.47455	0.849478	13.0913	1.41877	0.519794	1.13636	0.800942	2698.3	25.0542	2686.26	13.3844	2677.19	14.0546	2677.19	14.0546	100.789
11BQ19-59	35.9549	52408.9	1.63237	5.38286	0.64084	13.3088	1.04647	0.51958	0.8273	0.790562	2697.4	18.2352	2701.81	9.8834	2705.1	10.5776	2705.1	10.5776	99.7153
11BQ19-56	80.4901	97847.2	2.118	4.89547	0.394789	15.5654	1.38782	0.552656	1.33048	0.958686	2836.21	30.5289	2850.5	13.2418	2860.61	6.42448	2860.61	6.42448	99.147
11BQ19-39	126.957	141955	14.9151	3.67158	1.0624	25.0322	1.45774	0.666577	0.998147	0.684723	3292.65	25.7359	3309.47	14.234	3319.67	16.6401	3319.67	16.6401	99.1859
Mancos Formation, Burro Mountains, New Mexico. (see Table 4 for location)
12BQ21-79	401.053	45662.6	1.43739	21.676	7.30491	0.0915394	7.79428	0.0143908	2.71827	0.348752	92.108	2.48594	88.9364	6.63714			92.108	2.48594	NA
12BQ21-48	674.71	44963	3.24108	20.4165	2.9959	0.0998797	3.23542	0.0147896	1.2217	0.377602	94.642	1.1478	96.6652	2.98328			94.642	1.1478	NA
12BQ21-41	115.679	4011.62	2.16899	22.3018	27.1431	0.0918722	27.5637	0.0148601	4.79661	0.174019	95.0898	4.52761	89.2459	23.5536			95.0898	4.52761	NA
12BQ21-78	457.165	51823.7	1.83917	21.0722	6.30627	0.0997046	6.89774	0.0152379	2.79459	0.405146	97.4888	2.70391	96.5037	6.35011			97.4888	2.70391	NA
12BQ21-65	371.883	13126.7	1.90685	18.2751	15.9276	0.115593	17.0043	0.015321	5.95459	0.350182	98.0167	5.79235	111.069	17.8919			98.0167	5.79235	NA
12BQ21-19	799.806	16007.1	2.65782	20.1936	6.54666	0.106031	6.79352	0.015529	1.81471	0.267124	99.3373	1.78887	102.328	6.61295			99.3373	1.78887	NA
12BQ21-27	131.31	6997	1.76421	18.0209	19.0843	0.119098	19.522	0.0155661	4.111	0.210582	99.5728	4.06198	114.254	21.0986			99.5728	4.06198	NA
12BQ21-98	565.417	50046.4	2.4261	21.0063	7.23893	0.103983	7.44048	0.0158421	1.72009	0.23118	101.324	1.72924	100.446	7.11604			101.324	1.72924	NA
12BQ21-59	1221.65	64679.3	1.15245	21.0125	3.74882	0.104134	4.92479	0.0158697	3.19374	0.648502	101.499	3.21623	100.585	4.71618			101.499	3.21623	NA
12BQ21-9	392.505	33277.2	1.07028	21.12	5.39253	0.103738	6.24311	0.0158903	3.14595	0.503908	101.63	3.17217	100.221	5.95813			101.63	3.17217	NA
12BQ21-88	215.203	6661.71	2.53685	19.7838	10.7413	0.111776	10.9711	0.0160382	2.2339	0.203617	102.569	2.27315	107.589	11.2003			102.569	2.27315	NA
12BQ21-37	477.742	34537.5	2.09631	21.3693	6.11064	0.103626	6.24415	0.0160604	1.28434	0.205687	102.709	1.30868	100.117	5.95324			102.709	1.30868	NA
12BQ21-36	220.9	6480.66	1.60691	22.167	17.4525	0.100627	18.0109	0.0161779	4.45002	0.247074	103.455	4.56702	97.3554	16.7217			103.455	4.56702	NA
12BQ21-80	822.669	20936.5	2.48641	20.405	4.94648	0.109456	5.20308	0.0161985	1.61379	0.31016	103.585	1.65829	105.468	5.21223			103.585	1.65829	NA
12BQ21-32	102.604	2282.08	1.9659	17.3046	35.0048	0.131161	35.4738	0.0164613	5.74901	0.162064	105.253	6.00185	125.141	41.7891			105.253	6.00185	NA
12BQ21-11	450.028	12212.1	2.61495	20.6321	5.42715	0.111245	5.78342	0.0166464	1.99851	0.345558	106.426	2.10948	107.103	5.87881			106.426	2.10948	NA
12BQ21-46	484.03	7271.67	1.40887	19.9625	8.87478	0.119754	9.64174	0.0173381	3.76848	0.390851	110.811	4.14021	114.849	10.4705			110.811	4.14021	NA
12BQ21-18	465.658	44560.2	1.97532	20.4898	6.95105	0.117358	7.01802	0.0174401	0.967263	0.137826	111.457	1.06881	112.674	7.48465			111.457	1.06881	NA
12BQ21-61	652.397	35415.1	2.1076	20.6401	3.73728	0.116532	4.0567	0.0174444	1.57784	0.388947	111.484	1.74392	111.923	4.29913			111.484	1.74392	NA
12BQ21-93	671.903	53325.4	1.21819	20.9749	3.70339	0.115784	4.04595	0.0176135	1.6293	0.402699	112.555	1.81794	111.242	4.26304			112.555	1.81794	NA
12BQ21-5	451.382	15723.6	1.07304	18.5983	10.1993	0.165532	14.2298	0.0223282	9.92271	0.69732	142.354	13.9705	155.534	20.5232			142.354	13.9705	NA
12BQ21-95	683.685	84521.4	3.40255	20.4474	2.7866	0.156206	4.43187	0.0231651	3.44621	0.777597	147.628	5.02978	147.376	6.07973			147.628	5.02978	NA
12BQ21-15	49.0546	6442.52	0.58088	25.3171	48.5001	0.126265	49.2315	0.0231844	8.45502	0.17174	147.75	12.3502	120.736	56.0992			147.75	12.3502	NA
12BQ21-84	80.9553	9856.15	0.924896	24.2869	29.3836	0.132314	29.6335	0.0233064	3.8403	0.129593	148.518	5.63835	126.174	35.1742			148.518	5.63835	NA
12BQ21-58	589.385	35375.5	1.8492	19.9985	5.08118	0.161999	5.33336	0.0234967	1.62058	0.303858	149.717	2.39834	152.451	7.54996			149.717	2.39834	NA
12BQ21-86	171.754	27989	0.333775	19.1403	9.58355	0.169507	9.70219	0.0235307	1.51261	0.155904	149.931	2.2417	158.991	14.2795			149.931	2.2417	NA
12BQ21-44	329.067	46413.8	2.70074	20.4388	4.62471	0.160337	4.82562	0.0237677	1.37792	0.285543	151.424	2.06219	150.998	6.77078			151.424	2.06219	NA
12BQ21-100	59.9797	8087.03	2.03173	20.2196	17.0486	0.162092	18.0745	0.0237702	6.00266	0.332107	151.439	8.98446	152.533	25.6041			151.439	8.98446	NA
12BQ21-69	334.741	26098	1.94913	20.6	6.57086	0.159808	7.00829	0.0238762	2.43718	0.347757	152.107	3.66373	150.535	9.80548			152.107	3.66373	NA
12BQ21-26	301.891	28851.8	1.88483	19.8636	4.06521	0.170171	4.78051	0.0245156	2.51542	0.526182	156.132	3.88019	159.568	7.05908			156.132	3.88019	NA
12BQ21-34	395.906	41698.8	0.681161	20.5025	5.3496	0.173178	5.52746	0.0257513	1.39089	0.251632	163.902	2.25095	162.173	8.28503			163.902	2.25095	NA
12BQ21-83	181.651	20263.4	1.61327	21.1656	7.17779	0.168825	7.75595	0.0259159	2.93838	0.378855	164.936	4.78498	158.398	11.3755			164.936	4.78498	NA
12BQ21-73	250.099	26070.8	0.880148	20.5337	5.29591	0.174284	5.72965	0.0259552	2.18683	0.38167	165.183	3.56639	163.13	8.63481			165.183	3.56639	NA
12BQ21-81	461.625	53289.5	1.56737	20.2424	2.2755	0.177116	2.5063	0.0260028	1.05054	0.419161	165.483	1.71634	165.576	3.82917			165.483	1.71634	NA
12BQ21-545	385.615	30701	1.22105	20.4297	5.34206	0.177466	5.76746	0.0262953	2.17393	0.376931	167.32	3.59062	165.878	8.82659			167.32	3.59062	NA
12BQ21-1	473.364	55408.2	0.993763	20.449	2.22106	0.17975	2.65088	0.0266587	1.44708	0.545886	169.602	2.42227	167.845	4.1011			169.602	2.42227	NA
12BQ21-99	453.614	140722	1.01954	20.4591	5.00178	0.179869	5.08234	0.0266895	0.901313	0.177342	169.795	1.51041	167.947	7.86726			169.795	1.51041	NA
12BQ21-13	1299.43	54434	0.68516	19.7054	1.02321	0.192318	1.65232	0.0274855	1.29738	0.785188	174.792	2.23725	178.605	2.70616			174.792	2.23725	NA
12BQ21-47	155.948	9681.85	0.99209	19.5844	13.6927	0.198833	14.0278	0.0282421	3.04796	0.21728	179.537	5.39671	184.139	23.6281			179.537	5.39671	NA
12BQ21-39	362.868	64460.8	1.8292	20.4587	2.97924	0.19226	3.49639	0.0285277	1.82999	0.523395	181.327	3.27204	178.556	5.72496			181.327	3.27204	NA
12BQ21-7	431.694	38100.8	2.27975	19.6667	2.77353	0.210117	3.20085	0.0299704	1.59782	0.499184	190.363	2.99718	193.651	5.64331			190.363	2.99718	NA
12BQ21-12	640.708	68783.4	0.713732	19.6977	2.57147	0.229843	3.12829	0.0328356	1.7815	0.569481	208.271	3.65105	210.069	5.9364			208.271	3.65105	NA
12BQ21-91	411.099	81993.7	15.1409	20.0221	2.20006	0.227149	2.53178	0.0329852	1.25287	0.494856	209.205	2.57898	207.842	4.75853			209.205	2.57898	NA
12BQ21-75	442.952	61356.9	2.08723	19.7871	1.67113	0.248344	1.92771	0.0356397	0.960948	0.498491	225.749	2.13178	225.23	3.89398			225.749	2.13178	NA
12BQ21-38	240.85	6074.44	0.59968	19.6735	10.6102	0.253002	10.7884	0.0360996	1.95263	0.180994	228.611	4.3857	229.011	22.1221			228.611	4.3857	NA
12BQ21-21	55.245	13796.9	2.59335	24.2046	18.0329	0.207921	18.111	0.0365002	1.68049	0.0927883	231.103	3.81487	191.807	31.6646			231.103	3.81487	NA
12BQ21-43	182.398	18975.2	1.16433	19.6658	5.10616	0.264878	5.34485	0.0377794	1.57944	0.295506	239.054	3.70656	238.59	11.3653			239.054	3.70656	NA
12BQ21-25	60.1528	20075.9	1.84375	18.5615	14.1084	0.444902	14.681	0.059893	4.06017	0.27656	374.975	14.7903	373.703	45.9311			374.975	14.7903	NA
12BQ21-2	272.293	51795.9	4.7818	18.2931	1.85191	0.488874	2.42368	0.064861	1.56354	0.64511	405.121	6.13929	404.143	8.08078			405.121	6.13929	101.652
12BQ21-14	253.135	69538.2	1.96317	18.1669	2.642	0.493597	4.10942	0.0650357	3.14757	0.765939	406.178	12.3903	407.359	13.7904			406.178	12.3903	98.1021
12BQ21-66	175.618	56924.4	2.41333	18.1755	2.29473	0.494907	6.59626	0.0652394	6.18424	0.937538	407.411	24.4157	408.249	22.1772			407.411	24.4157	98.653
12BQ21-90	512.585	95957.1	2.98148	18.1484	1.06846	0.504115	1.37611	0.066354	0.867222	0.630199	414.152	3.47868	414.484	4.6831			414.152	3.47868	99.4815
12BQ21-96	347.96	128038	3.02934	17.8209	1.85391	0.584871	2.71622	0.0755943	1.98516	0.730854	469.772	8.99404	467.587	10.1783			469.772	8.99404	102.823
12BQ21-77	213.765	122594	2.38053	17.5835	2.07608	0.597048	2.47737	0.07614	1.35176	0.545643	473.042	6.1654	475.359	9.40425			473.042	6.1654	97.221
12BQ21-68	119.814	108204	2.36172	16.3977	2.58228	0.829078	3.305	0.0985998	2.06273	0.624124	606.198	11.9343	613.1	15.2124	638.702	55.5723	606.198	11.9343	94.9109
12BQ21-33	367.767	130386	3.9787	16.4526	1.393	0.86541	1.83366	0.103265	1.19241	0.650289	633.517	7.19478	633.072	8.63785	631.5	30.0036	633.517	7.19478	100.319
12BQ21-40	387.142	144557	3.2554	13.6006	0.458837	1.74124	1.12764	0.171758	1.03007	0.913473	1021.79	9.7334	1023.92	7.2731	1028.47	9.27907	1028.47	9.27907	99.3511
12BQ21-94	113.848	93866.6	2.76255	13.3727	1.21933	1.85891	1.38215	0.180293	0.650841	0.470889	1068.57	6.40888	1066.6	9.1255	1062.59	24.5392	1062.59	24.5392	100.563
12BQ21-62	155.368	166742	3.18968	13.1974	0.85618	1.91098	1.99644	0.182913	1.80353	0.903374	1082.87	17.9777	1084.93	13.3085	1089.05	17.1375	1089.05	17.1375	99.4325
12BQ21-35	42.899	20347.4	2.19953	13.144	4.29879	1.85401	4.58069	0.176741	1.58211	0.345387	1049.15	15.3184	1064.86	30.2235	1097.18	86.0892	1097.18	86.0892	95.6222
12BQ21-10	123.278	126667	2.89707	12.7287	0.783489	2.09289	1.81658	0.19321	1.63894	0.902209	1138.74	17.1078	1146.48	12.4821	1161.12	15.5334	1161.12	15.5334	98.0725
12BQ21-4	142.932	125124	1.84623	12.5645	1.08453	2.23236	1.70319	0.203428	1.31326	0.771059	1193.71	14.3107	1191.26	11.9442	1186.84	21.4404	1186.84	21.4404	100.578
12BQ21-64	160.562	62936.1	1.32087	12.4085	1.2693	2.29144	3.61578	0.206217	3.38566	0.936358	1208.63	37.3135	1209.65	25.565	1211.45	24.9817	1211.45	24.9817	99.7677
12BQ21-24	19.9229	21233.9	3.47883	11.6529	6.90569	2.69023	7.12082	0.227365	1.73707	0.243943	1320.67	20.7438	1325.77	52.7578	1334.01	133.72	1334.01	133.72	99.0003
12BQ21-51	244.369	83625.7	2.40584	11.1869	0.441329	2.79702	1.45565	0.226936	1.38713	0.952932	1318.42	16.5394	1354.74	10.8882	1412.52	8.44344	1412.52	8.44344	93.3382
12BQ21-87	1036.15	387780	0.93946	11.1573	0.191998	3.08417	1.15579	0.249572	1.13973	0.986106	1436.27	14.6742	1428.76	8.86246	1417.59	3.67074	1417.59	3.67074	101.318
12BQ21-85	183.841	157866	1.34584	11.1351	0.365886	3.06036	1.41342	0.247154	1.36524	0.965913	1423.78	17.4412	1422.83	10.8175	1421.38	6.99165	1421.38	6.99165	100.169
12BQ21-23	366.835	51567.6	3.20802	11.1194	0.376375	2.84244	1.84894	0.22923	1.81023	0.979062	1330.46	21.7616	1366.81	13.8888	1424.09	7.18945	1424.09	7.18945	93.4254
12BQ21-74	93.3514	11229.8	1.1931	10.9856	1.56454	2.98376	4.70622	0.23773	4.43855	0.943124	1374.89	54.9577	1403.49	35.8057	1447.18	29.794	1447.18	29.794	95.0044
12BQ21-50	326.555	318490	1.86854	10.5019	0.244675	3.51447	1.07648	0.267685	1.04831	0.973827	1529.04	14.2699	1530.47	8.50941	1532.44	4.6064	1532.44	4.6064	99.7784
12BQ21-6	164.711	123131	2.2485	9.97304	0.460995	3.83544	1.34741	0.277422	1.2661	0.939651	1578.37	17.7253	1600.21	10.8524	1629.09	8.57022	1629.09	8.57022	96.8866
12BQ21-16	88.482	81913.9	1.5329	9.89238	0.888856	4.08623	1.28072	0.293172	0.922053	0.719948	1657.36	13.4754	1651.56	10.4478	1644.17	16.4926	1644.17	16.4926	100.802
12BQ21-30	243.899	24037.9	1.75272	9.83366	1.11531	4.04599	4.08807	0.288561	3.93299	0.962065	1634.34	56.7787	1643.49	33.2953	1655.21	20.6637	1655.21	20.6637	98.7391
12BQ21-67	63.9688	83624	1.05379	9.76323	1.21884	4.07272	2.39128	0.288388	2.05734	0.86035	1633.47	29.6864	1648.86	19.4965	1668.51	22.5439	1668.51	22.5439	97.8999
12BQ21-42	266.21	304426	3.367	9.71549	0.209748	4.2275	0.789798	0.297884	0.761438	0.964091	1680.81	11.2659	1679.38	6.48547	1677.57	3.87522	1677.57	3.87522	100.193
12BQ21-8	112.347	156767	1.45151	9.66674	0.618129	4.16754	1.98038	0.292186	1.88145	0.950041	1652.44	27.425	1667.66	16.2186	1686.86	11.4069	1686.86	11.4069	97.9597
12BQ21-60	243.652	129450	2.67339	9.65399	0.296214	4.38655	3.26386	0.307135	3.25039	0.995873	1726.59	49.2346	1709.81	26.9945	1689.3	5.46458	1689.3	5.46458	102.208
12BQ21-22	534.105	393432	2.26126	9.64828	0.208551	4.23422	1.25287	0.296293	1.23539	0.986048	1672.9	18.2029	1680.68	10.2913	1690.39	3.84683	1690.39	3.84683	98.9657
12BQ21-72	83.0699	87927.7	1.73257	9.62441	0.886368	4.19464	1.46258	0.292798	1.1634	0.795443	1655.5	16.9858	1672.97	11.9925	1694.95	16.3387	1694.95	16.3387	97.672
12BQ21-31	759.89	522750	2.2433	9.54109	0.527703	4.49789	1.94963	0.311247	1.87685	0.962672	1746.84	28.7192	1730.58	16.1969	1710.96	9.70686	1710.96	9.70686	102.097
12BQ21-82	448.124	621179	1.9987	9.44242	0.173047	4.38193	1.63437	0.300087	1.62518	0.994379	1691.74	24.1823	1708.94	13.5124	1730.07	3.17602	1730.07	3.17602	97.7847
12BQ21-3	214.671	220730	2.17374	9.36198	0.375073	4.57109	1.04074	0.310374	0.970807	0.932802	1742.55	14.8232	1744.01	8.67089	1745.75	6.86871	1745.75	6.86871	99.8167
12BQ21-56	58.1725	70504.6	1.07871	9.20022	0.915312	4.74714	1.6233	0.316759	1.34064	0.825871	1773.88	20.7899	1775.6	13.6155	1777.61	16.6987	1777.61	16.6987	99.7901
12BQ21-70	931.541	318468	5.49888	9.09914	0.463878	4.62951	3.10285	0.305516	3.06798	0.988762	1718.6	46.2839	1754.6	25.9149	1797.74	8.44267	1797.74	8.44267	95.5979
12BQ21-71	222.603	45707.5	2.30079	5.34392	0.527311	12.4289	2.31683	0.481715	2.25602	0.973755	2534.73	47.2819	2637.36	21.7762	2717.08	8.69379	2717.08	8.69379	93.289
12BQ21-49	51.7415	92795.4	2.3519	5.26153	0.532382	13.6736	1.39387	0.521788	1.28819	0.924185	2706.76	28.4736	2727.37	13.1893	2742.66	8.75343	2742.66	8.75343	98.6912
Sarten Formation, Cookes Range, New Mexico. (see Table 4 for location)
12BQ37-91	615.729	9479.16	2.73428	20.3301	4.7035	0.102043	4.82904	0.015046	1.09394	0.226533	96.27	1.04531	98.6603	4.54023			96.27	1.04531	NA
12BQ37-86	253.647	10663.4	0.971181	21.967	8.21731	0.0947249	8.40715	0.0150915	1.77653	0.211312	96.5594	1.70262	91.8954	7.38662			96.5594	1.70262	NA
12BQ37-95	376.103	17443.7	2.32787	20.8765	6.83337	0.10017	7.13143	0.0151668	2.0402	0.286085	97.0372	1.96493	96.933	6.5931			97.0372	1.96493	NA
12BQ37-35	189.508	14611.9	1.35439	22.3603	12.4834	0.093971	12.8833	0.0152395	3.18504	0.247222	97.499	3.08202	91.1958	11.2374			97.499	3.08202	NA
12BQ37-16	397.719	19307.8	1.87047	22.2011	8.17458	0.0946757	8.84338	0.0152445	3.37365	0.381489	97.5307	3.26558	91.8497	7.76622			97.5307	3.26558	NA
12BQ37-39	182.595	8988.13	1.39463	23.1729	14.8407	0.0909319	15.0107	0.0152825	2.2524	0.150053	97.7723	2.18561	88.3711	12.7049			97.7723	2.18561	NA
12BQ37-20	365.607	13713.6	1.81164	21.4696	9.63917	0.0981893	9.79707	0.0152893	1.75185	0.178814	97.8151	1.70064	95.1035	8.89455			97.8151	1.70064	NA
12BQ37-92	496.003	20658.4	2.30024	20.2087	4.50144	0.104445	4.81914	0.0153082	1.72079	0.357074	97.9353	1.67252	100.871	4.62749			97.9353	1.67252	NA
12BQ37-93	229.943	14085.6	1.06745	20.4471	12.7915	0.103547	13.0475	0.0153556	2.57217	0.197139	98.2363	2.50765	100.045	12.4315			98.2363	2.50765	NA
12BQ37-54	853.874	101919	1.41739	20.7575	2.73287	0.10203	3.05439	0.0153603	1.36409	0.446599	98.2662	1.33027	98.6483	2.87137			98.2662	1.33027	NA
12BQ37-62	506.452	63358.4	2.14856	21.1079	2.6588	0.100878	3.38608	0.0154432	2.09673	0.619222	98.7923	2.05562	97.586	3.15053			98.7923	2.05562	NA
12BQ37-90	228.023	10992.8	1.54863	22.2194	12.009	0.0960178	12.5156	0.0154733	3.52497	0.281645	98.9835	3.46249	93.0938	11.1336			98.9835	3.46249	NA
12BQ37-24	626.776	39626.4	1.22906	20.4032	5.07586	0.107023	5.48296	0.0158371	2.07326	0.378129	101.293	2.08365	103.239	5.38233			101.293	2.08365	NA
12BQ37-34	281.813	24971.4	0.686778	19.9874	3.65867	0.177665	4.21701	0.0257548	2.09697	0.497265	163.924	3.39411	166.049	6.45983			163.924	3.39411	NA
12BQ37-83	554.786	21600	1.15995	19.8243	2.60477	0.179578	2.68489	0.0258196	0.650985	0.242463	164.331	1.05625	167.697	4.15035			164.331	1.05625	NA
12BQ37-12	487.943	36524.8	1.17967	20.2864	1.84523	0.177133	2.14561	0.0260617	1.09487	0.510286	165.853	1.79271	165.591	3.27835			165.853	1.79271	NA
12BQ37-73	537.685	36299.4	1.30322	20.2959	2.44922	0.177795	2.98136	0.0261714	1.69995	0.570192	166.542	2.79486	166.162	4.5698			166.542	2.79486	NA
12BQ37-38	287.101	38217.6	1.25675	20.2112	2.99792	0.226764	3.22945	0.0332403	1.20078	0.37182	210.796	2.49025	207.523	6.06145			210.796	2.49025	NA
12BQ37-40	504.648	16937.6	0.587709	19.0931	2.9947	0.242531	5.25005	0.0335847	4.31217	0.821357	212.945	9.03254	220.491	10.4056			212.945	9.03254	NA
12BQ37-8	112.601	37093.6	1.59283	19.444	10.9473	0.241639	11.1186	0.0340762	1.94443	0.174881	216.009	4.13057	219.761	21.9745			216.009	4.13057	NA
12BQ37-59	272.305	47367.6	0.849407	19.8708	4.98981	0.236904	5.24348	0.0341418	1.61118	0.307272	216.418	3.429	215.882	10.1977			216.418	3.429	NA
12BQ37-3	255.659	23779.5	2.55615	18.1293	13.9736	0.261844	15.1109	0.0344289	5.75119	0.380599	218.208	12.3395	236.152	31.8492			218.208	12.3395	NA
12BQ37-88	415.202	80166.6	1.37014	19.4516	1.75331	0.246997	2.79007	0.0348454	2.17035	0.777883	220.803	4.71106	224.134	5.61146			220.803	4.71106	NA
12BQ37-82	252.86	31653	2.14559	19.6517	3.77075	0.256875	3.97619	0.0366119	1.26154	0.317273	231.798	2.87227	232.146	8.25157			231.798	2.87227	NA
12BQ37-11	483.135	83748.1	2.99121	19.1155	2.43182	0.320517	7.09909	0.044436	6.66958	0.939498	280.271	18.2924	282.3	17.4978			280.271	18.2924	NA
12BQ37-60	178.772	23544.8	1.3511	19.4855	4.82274	0.355276	8.24671	0.0502084	6.6895	0.811172	315.801	20.6165	308.682	21.9542			315.801	20.6165	NA
12BQ37-13	830.222	194025	3.53013	18.8725	1.07399	0.386493	1.26421	0.0529016	0.666916	0.527535	332.311	2.16008	331.804	3.57829			332.311	2.16008	NA
12BQ37-9	142.043	34339.1	1.66306	18.1964	3.82862	0.505765	4.45464	0.0667471	2.27718	0.511192	416.528	9.18515	415.597	15.1938			416.528	9.18515	101.49
12BQ37-76	486.255	119978	1.52547	17.8303	0.504486	0.57524	1.79281	0.0743886	1.72036	0.959592	462.541	7.67862	461.398	6.6477			462.541	7.67862	101.504
12BQ37-65	233.367	276246	4.24783	13.6728	0.378354	1.71782	1.25551	0.170347	1.19714	0.953512	1014.02	11.2327	1015.21	8.0578	1017.76	7.66343	1017.76	7.66343	99.6322
12BQ37-87	186.712	157587	1.54957	13.6589	0.81405	1.71257	2.64441	0.169654	2.516	0.951439	1010.2	23.5254	1013.25	16.9538	1019.82	16.4819	1019.82	16.4819	99.057
12BQ37-52	291.827	124076	2.33667	13.5779	0.409334	1.76345	1.98391	0.173658	1.94122	0.978483	1032.24	18.5161	1032.12	12.8554	1031.84	8.2726	1031.84	8.2726	100.038
12BQ37-41	231.433	246594	0.767484	13.4449	0.706075	1.85497	1.52725	0.180881	1.35424	0.886715	1071.78	13.3721	1065.2	10.0761	1051.75	14.2466	1051.75	14.2466	101.904
12BQ37-98	98.3216	78518.6	147.331	13.4225	1.99857	1.8128	3.36127	0.176474	2.70257	0.804032	1047.68	26.1333	1050.09	21.9995	1055.12	40.2728	1055.12	40.2728	99.2952
12BQ37-78	76.3921	53058.5	2.36424	13.3893	2.24261	1.88753	2.922	0.183295	1.87317	0.641059	1084.95	18.7049	1076.71	19.3968	1060.1	45.1562	1060.1	45.1562	102.344
12BQ37-25	75.0522	86991.2	2.00271	13.3131	1.39923	1.85995	1.74748	0.179588	1.04683	0.599047	1064.72	10.274	1066.97	11.54	1071.58	28.1228	1071.58	28.1228	99.3603
12BQ37-70	178.547	91159.8	3.09581	13.2157	0.662265	1.90635	1.73633	0.182721	1.60506	0.924403	1081.82	15.9852	1083.31	11.5647	1086.31	13.2569	1086.31	13.2569	99.5867
12BQ37-66	84.2559	55255.6	2.47087	12.9082	1.51026	2.07791	2.15323	0.194532	1.53477	0.712776	1145.88	16.1123	1141.54	14.7612	1133.34	30.0655	1133.34	30.0655	101.106
12BQ37-17	51.3557	34972.8	1.43512	12.6676	1.91105	2.17151	2.36127	0.199505	1.3869	0.587353	1172.66	14.8702	1171.96	16.4176	1170.7	37.8495	1170.7	37.8495	100.168
12BQ37-33	82.4071	51730.9	2.22713	12.5998	1.02495	2.15707	2.20604	0.197119	1.95348	0.885514	1159.82	20.7357	1167.33	15.3058	1181.3	20.2699	1181.3	20.2699	98.1817
12BQ37-68	344.527	230205	2.56737	12.5532	0.430085	2.26411	1.16543	0.206134	1.08317	0.929416	1208.19	11.9335	1201.18	8.20841	1188.63	8.49296	1188.63	8.49296	101.645
12BQ37-80	198.627	44175.7	1.67126	12.5142	0.401908	2.23656	1.40963	0.202994	1.35112	0.958493	1191.38	14.6971	1192.58	9.89112	1194.75	7.92063	1194.75	7.92063	99.7183
12BQ37-42	137.204	114798	1.92435	12.2938	1.09113	2.25467	2.6026	0.201033	2.36283	0.907873	1180.87	25.4956	1198.24	18.3088	1229.73	21.4083	1229.73	21.4083	96.0262
12BQ37-74	26.3481	29359.8	2.29657	12.2831	5.84086	2.37456	6.38665	0.211539	2.58333	0.40449	1237.01	29.0773	1234.98	45.6627	1231.44	114.701	1231.44	114.701	100.452
12BQ37-14	330.906	220120	3.41388	12.15	0.430144	2.48982	2.38617	0.219404	2.34708	0.983618	1278.72	27.2236	1269.08	17.2877	1252.75	8.42908	1252.75	8.42908	102.074
12BQ37-36	97.8604	73916.6	1.91665	11.6679	0.78451	2.72435	2.20601	0.230544	2.0618	0.934629	1337.35	24.9014	1335.12	16.3866	1331.53	15.1796	1331.53	15.1796	100.437
12BQ37-15	64.1488	49752.6	2.95597	11.2751	1.48806	2.88517	2.3336	0.235933	1.79759	0.770311	1365.52	22.1211	1378.04	17.5979	1397.49	28.529	1397.49	28.529	97.7127
12BQ37-27	209.787	162249	2.49354	11.2072	0.419698	3.04102	1.39811	0.247181	1.33363	0.953879	1423.92	17.0388	1417.98	10.6835	1409.05	8.03338	1409.05	8.03338	101.055
12BQ37-63	124.012	191264	1.95336	11.1777	0.736511	3.02794	1.54417	0.245471	1.3572	0.878923	1415.08	17.2437	1414.69	11.7871	1414.09	14.0879	1414.09	14.0879	100.07
12BQ37-75	182.512	237322	2.92037	11.1734	0.457533	3.04586	3.20327	0.246828	3.17043	0.989747	1422.1	40.4604	1419.2	24.491	1414.83	8.75072	1414.83	8.75072	100.514
12BQ37-81	170.453	124342	2.85672	11.141	0.604767	3.08713	1.94507	0.249448	1.84866	0.950435	1435.63	23.7924	1429.5	14.9187	1420.37	11.558	1420.37	11.558	101.074
12BQ37-49	183.108	387797	2.60671	11.1049	0.601502	3.08815	1.91482	0.248722	1.81789	0.94938	1431.88	23.3419	1429.75	14.6879	1426.57	11.486	1426.57	11.486	100.372
12BQ37-43	210.578	270517	2.05788	11.0628	0.665619	3.05524	1.3961	0.245137	1.22721	0.879027	1413.35	15.575	1421.55	10.6805	1433.83	12.6979	1433.83	12.6979	98.5717
12BQ37-61	172.494	187920	1.08524	11.0356	0.469158	3.08797	1.02296	0.247153	0.909036	0.888629	1423.78	11.613	1429.71	7.84629	1438.53	8.94429	1438.53	8.94429	98.9744
12BQ37-67	568.683	154108	3.92432	10.8248	0.18623	3.38537	2.46292	0.265781	2.45587	0.997137	1519.35	33.2424	1501.01	19.3078	1475.21	3.53289	1475.21	3.53289	102.992
12BQ37-47	291.533	254048	4.44465	10.4567	0.287133	3.34722	2.05382	0.253851	2.03365	0.990179	1458.3	26.5417	1492.14	16.0583	1540.54	5.39995	1540.54	5.39995	94.6617
12BQ37-26	363.67	479538	3.01378	10.4234	0.223372	3.37217	1.66654	0.254928	1.6515	0.990977	1463.84	21.627	1497.95	13.0521	1546.54	4.1975	1546.54	4.1975	94.6523
12BQ37-57	125.45	223361	2.06912	10.1062	1.64481	3.65714	4.29486	0.268057	3.96741	0.92376	1530.93	54.0661	1562.07	34.2583	1604.39	30.6746	1604.39	30.6746	95.4214
12BQ37-30	42.2987	69588.9	1.41836	9.85604	1.36601	4.23529	2.44315	0.30275	2.02559	0.829087	1704.93	30.3456	1680.89	20.0715	1650.99	25.3231	1650.99	25.3231	103.267
12BQ37-28	93.4699	113891	0.921185	9.81917	0.835215	4.13023	1.93947	0.294136	1.75041	0.902523	1662.16	25.6466	1660.3	15.8557	1657.94	15.4683	1657.94	15.4683	100.255
12BQ37-7	258.367	176471	1.52004	9.79057	0.342222	4.05859	1.22458	0.288192	1.17579	0.960157	1632.49	16.957	1646.03	9.97646	1663.34	6.33253	1663.34	6.33253	98.1455
12BQ37-69	285.204	155946	1.18389	9.66878	0.267483	4.25917	1.89179	0.298673	1.87279	0.989954	1684.72	27.7655	1685.51	15.5577	1686.47	4.93631	1686.47	4.93631	99.8964
12BQ37-22	136.495	142947	2.37844	9.65831	0.374303	4.30813	1.54675	0.301779	1.50077	0.970278	1700.12	22.4278	1694.92	12.7473	1688.47	6.9059	1688.47	6.9059	100.69
12BQ37-4	71.3246	128624	1.11749	9.63822	1.11288	4.25071	1.55036	0.297137	1.07941	0.696229	1677.1	15.9395	1683.87	12.7447	1692.31	20.5216	1692.31	20.5216	99.1011
12BQ37-31	195.991	161453	2.72141	9.54083	0.449327	4.44766	1.67474	0.307763	1.61334	0.963337	1729.69	24.4756	1721.26	13.8844	1711.01	8.26485	1711.01	8.26485	101.092
12BQ37-6	73.3669	211338	2.51906	9.52504	1.39125	4.45036	1.68577	0.307441	0.95198	0.564713	1728.1	14.4306	1721.77	13.9774	1714.06	25.5852	1714.06	25.5852	100.819
12BQ37-44	294.242	22539.7	1.24137	9.46765	0.729761	4.08979	5.36189	0.280829	5.31199	0.990695	1595.54	75.0838	1652.27	43.7741	1725.17	13.4021	1725.17	13.4021	92.486
12BQ37-37	139.589	263514	1.68759	9.4054	0.376918	4.51394	1.31547	0.307916	1.26031	0.958072	1730.44	19.1272	1733.54	10.9351	1737.27	6.90978	1737.27	6.90978	99.607
12BQ37-10	432.225	28421.8	1.01343	9.14489	0.326542	4.67209	2.3495	0.309877	2.3267	0.990295	1740.1	35.4831	1762.26	19.653	1788.61	5.94983	1788.61	5.94983	97.288
12BQ37-94	185.889	128718	1.75175	8.87019	0.579845	5.14151	2.36744	0.330767	2.29533	0.969542	1842.1	36.7781	1842.99	20.1271	1843.99	10.492	1843.99	10.492	99.8978
12BQ37-96	115.697	183161	3.05238	8.74743	0.660118	5.39305	1.35427	0.342148	1.1825	0.87316	1896.99	19.4327	1883.75	11.6006	1869.17	11.9104	1869.17	11.9104	101.489
12BQ37-72	61.1044	79066	1.27525	7.80647	0.500363	6.67665	1.51	0.378018	1.42469	0.943502	2067.02	25.1941	2069.54	13.3358	2072.03	8.81415	2072.03	8.81415	99.7579
12BQ37-18	113.396	390991	1.90038	7.53389	0.520891	6.984	1.91739	0.381612	1.84528	0.962391	2083.81	32.8564	2109.4	17.032	2134.43	9.11386	2134.43	9.11386	97.6285
12BQ37-71	90.6648	213177	1.30202	5.28645	0.249422	13.6606	2.14631	0.523761	2.13176	0.993225	2715.11	47.2369	2726.47	20.3094	2734.89	4.10201	2734.89	4.10201	99.2769
12BQ37-23	189.055	216924	2.43267	4.46864	0.0958095	18.3975	1.43866	0.596258	1.43547	0.99778	3014.74	34.5658	3010.76	13.8557	3008.09	1.53932	3008.09	1.53932	100.221
Encinal Canyon Member of Dakota Formation, San Ysidro, New Mexico. (see Table 4 for location)
12BQ38-87	523.695	6336.19	0.644306	20.0707	8.35222	0.104129	8.78957	0.0151576	2.73806	0.311512	96.9789	2.63546	100.58	8.41701			96.9789	2.63546	NA
12BQ38-75	718.096	33660.3	1.63253	20.0365	3.46616	0.104672	3.95688	0.0152107	1.90857	0.482343	97.3161	1.8434	101.08	3.80698			97.3161	1.8434	NA
12BQ38-44	514.468	25881.3	1.19487	20.4972	7.84019	0.102544	8.55143	0.0152442	3.41443	0.399282	97.5288	3.30499	99.122	8.07592			97.5288	3.30499	NA
12BQ38-11	585.075	64352.8	2.01456	20.7536	3.07377	0.101381	3.5572	0.0152598	1.79043	0.503326	97.6277	1.73479	98.0499	3.32474			97.6277	1.73479	NA
12BQ38-10	381.127	27230.2	1.50611	21.5861	4.75731	0.0976817	5.31916	0.0152928	2.37938	0.447323	97.8375	2.31035	94.6341	4.80632			97.8375	2.31035	NA
12BQ38-15	406.122	54670.6	2.06439	21.9757	6.47474	0.0962034	6.69317	0.0153332	1.69594	0.253383	98.0938	1.65102	93.2658	5.96439			98.0938	1.65102	NA
12BQ38-92	368.37	20658.4	0.933666	20.3583	4.42407	0.104715	5.32716	0.0154614	2.96754	0.557058	98.9078	2.91272	101.119	5.12728			98.9078	2.91272	NA
12BQ38-30	926.233	84149.7	0.555493	20.8454	3.17297	0.10344	3.34588	0.0156385	1.06169	0.317312	100.032	1.05383	99.9464	3.18478			100.032	1.05383	NA
12BQ38-99	324.949	25552.5	2.58248	22.8042	6.56699	0.0949882	6.67806	0.0157103	1.21287	0.18162	100.488	1.20933	92.1395	5.88228			100.488	1.20933	NA
12BQ38-43	53.6673	3893.67	0.333318	41.1124	86.2036	0.0527868	86.4928	0.0157397	7.06607	0.0816955	100.675	7.05848	52.2321	44.0623			100.675	7.05848	NA
12BQ38-59	389.08	33965.3	2.2231	21.0982	7.30391	0.104548	7.54591	0.0159977	1.8957	0.251222	102.312	1.92421	100.966	7.25236			102.312	1.92421	NA
12BQ38-73	369.401	32939.9	1.82112	21.092	5.6117	0.104764	6.39986	0.0160261	3.07686	0.480769	102.492	3.1286	101.164	6.16237			102.492	3.1286	NA
12BQ38-48	48.1118	4026.15	0.499402	21.3511	34.6777	0.104558	35.135	0.0161911	5.65045	0.160821	103.539	5.80367	100.975	33.7831			103.539	5.80367	NA
12BQ38-08	344.014	20923.8	2.30003	20.5051	6.8695	0.112873	7.06549	0.0167862	1.6526	0.233898	107.313	1.75877	108.59	7.27654			107.313	1.75877	NA
12BQ38-46	326.028	13992.4	1.38898	21.0692	7.57808	0.110808	8.01849	0.0169323	2.62084	0.32685	108.239	2.81309	106.704	8.12199			108.239	2.81309	NA
12BQ38-61	274.432	29533.8	0.673929	20.994	4.84729	0.157064	4.99056	0.0239149	1.18721	0.237891	152.351	1.78752	148.13	6.87867			152.351	1.78752	NA
12BQ38-36	464.084	36690	1.09054	20.1822	3.11698	0.177155	3.25312	0.0259312	0.931264	0.286268	165.033	1.51738	165.61	4.97113			165.033	1.51738	NA
12BQ38-60	479.667	34032.8	1.04876	19.6414	2.44601	0.183919	2.84353	0.0261998	1.45006	0.509952	166.72	2.38655	171.427	4.48533			166.72	2.38655	NA
12BQ38-14	535.999	46540.3	0.646399	20.2902	2.21309	0.181629	2.34689	0.0267283	0.78112	0.332831	170.039	1.31085	169.462	3.66294			170.039	1.31085	NA
12BQ38-34	267.965	20339.6	1.91309	20.1532	3.91578	0.198367	4.25545	0.0289942	1.66601	0.391499	184.25	3.02617	183.743	7.15257			184.25	3.02617	NA
12BQ38-01	210.152	86974	2.03867	20.1764	5.14381	0.198504	5.70048	0.0290476	2.45697	0.431011	184.585	4.47088	183.859	9.58703			184.585	4.47088	NA
12BQ38-35	256.83	23500	1.3604	19.5893	3.81435	0.206466	4.10622	0.0293336	1.52045	0.370279	186.376	2.79318	190.583	7.1353			186.376	2.79318	NA
12BQ38-77	123.369	23886.3	1.00116	18.9997	8.19536	0.216084	8.47229	0.0297761	2.14842	0.253582	189.147	4.00463	198.645	15.287			189.147	4.00463	NA
12BQ38-72	140.775	23640.3	1.17908	21.3885	8.35588	0.192855	8.44378	0.0299165	1.21517	0.143913	190.026	2.27544	179.063	13.8624			190.026	2.27544	NA
12BQ38-16	92.1812	22859.5	1.35104	20.2318	8.49615	0.208261	9.57596	0.0305592	4.41752	0.461313	194.047	8.44433	192.092	16.761			194.047	8.44433	NA
12BQ38-52	125.061	28708.9	1.06767	19.4939	7.31256	0.217527	7.59289	0.0307546	2.04414	0.269217	195.269	3.93172	199.849	13.7752			195.269	3.93172	NA
12BQ38-67	143.419	49056	1.25716	18.9242	8.70354	0.226075	9.17123	0.031029	2.89134	0.315262	196.985	5.60937	206.953	17.1725			196.985	5.60937	NA
12BQ38-37	282.603	75581.8	1.83769	19.2523	3.57201	0.230635	4.21097	0.0322038	2.23002	0.529574	204.326	4.48506	210.723	8.01342			204.326	4.48506	NA
12BQ38-41	264.532	41428.1	2.18961	19.9637	4.42019	0.226729	4.64487	0.0328283	1.42714	0.30725	208.225	2.92417	207.495	8.71712			208.225	2.92417	NA
12BQ38-28	485.033	111686	1.85348	19.6938	1.35365	0.233194	2.10077	0.0333079	1.60651	0.764724	211.218	3.33825	212.832	4.03365			211.218	3.33825	NA
12BQ38-18	177.526	27961.1	1.4735	20.5431	5.54297	0.223814	5.63766	0.0333467	1.02889	0.182503	211.46	2.14039	205.079	10.4692			211.46	2.14039	NA
12BQ38-91	142.709	30867.4	1.5509	20.0787	6.91715	0.230182	7.43693	0.0335202	2.73148	0.367286	212.543	5.71089	210.349	14.1304			212.543	5.71089	NA
12BQ38-51	395.289	83308.8	1.58238	19.8042	3.93812	0.233642	4.24322	0.0335589	1.57992	0.372339	212.784	3.30693	213.201	8.16013			212.784	3.30693	NA
12BQ38-20	482.675	21197.9	2.02747	19.1476	3.22396	0.247209	3.90297	0.0343303	2.19983	0.563629	217.593	4.70679	224.306	7.85522			217.593	4.70679	NA
12BQ38-58	318.25	51611.1	1.27687	19.7345	4.04222	0.245758	4.21178	0.0351749	1.18302	0.280884	222.855	2.59137	223.125	8.43683			222.855	2.59137	NA
12BQ38-56	218.134	49743.7	1.61107	19.7843	2.48015	0.273488	2.89053	0.0392426	1.48459	0.513604	248.137	3.61381	245.478	6.30313			248.137	3.61381	NA
12BQ38-21	354.057	116112	2.2959	19.4997	3.09674	0.28708	3.37503	0.0406004	1.34203	0.397634	256.553	3.3754	256.259	7.64387			256.553	3.3754	NA
12BQ38-88	118.375	25722.9	1.48539	19.2074	6.99186	0.412289	7.2641	0.057434	1.97002	0.2712	360.001	6.89771	350.522	21.5355			360.001	6.89771	NA
12BQ38-06	156.631	71171.6	1.34764	19.0053	2.37565	0.418705	3.3064	0.0577141	2.29969	0.695527	361.709	8.08911	355.124	9.90865			361.709	8.08911	NA
12BQ38-74	99.0874	26760.8	3.19587	19.1279	5.6258	0.426273	5.83475	0.0591363	1.54746	0.265215	370.37	5.56981	360.527	17.7085			370.37	5.56981	NA
12BQ38-63	212.814	92298.1	0.932538	18.2335	1.86562	0.490933	2.12672	0.0649221	1.02099	0.480079	405.49	4.01251	405.546	7.1107			405.49	4.01251	99.912
12BQ38-86	147.463	15736.5	6.5901	18.235	2.62354	0.494481	3.073	0.0653966	1.60012	0.520702	408.362	6.33161	407.96	10.3244			408.362	6.33161	100.666
12BQ38-45	243.958	100249	3.05077	17.8796	1.27575	0.524778	3.4066	0.0680508	3.1587	0.927229	424.401	12.9738	428.338	11.9053			424.401	12.9738	94.4055
12BQ38-32	59.0911	23299.3	1.31215	17.049	7.60035	0.692213	8.1879	0.0855928	3.04572	0.371978	529.42	15.4803	534.129	34.0212	554.3	166.042	529.42	15.4803	95.5115
12BQ38-04	72.8082	49694.5	0.581747	17.2807	4.18577	0.706966	5.04388	0.0886051	2.81426	0.557956	547.282	14.7663	542.943	21.2144	524.749	91.8213	547.282	14.7663	104.294
12BQ38-03	98.9282	63810	1.55236	16.7584	2.9084	0.814198	3.67969	0.0989606	2.25418	0.6126	608.314	13.0854	604.806	16.7697	591.668	63.0688	608.314	13.0854	102.814
12BQ38-55	37.6171	28815.5	0.904524	13.9366	3.35302	1.54321	3.65495	0.155984	1.45461	0.397984	934.42	12.653	947.784	22.5229	978.936	68.3509	978.936	68.3509	95.4527
12BQ38-69	83.1347	79594.4	2.93437	13.7248	1.31117	1.7114	1.84687	0.170356	1.30067	0.704258	1014.07	12.2047	1012.81	11.837	1010.06	26.5689	1010.06	26.5689	100.398
12BQ38-05	317.098	78844.4	1.63223	13.7114	0.738517	1.67149	1.45241	0.16622	1.25064	0.861076	991.251	11.4909	997.753	9.22747	1012.05	14.9704	1012.05	14.9704	97.9448
12BQ38-82	106.436	102285	1.11293	13.675	1.33316	1.78671	1.57884	0.177207	0.845829	0.535729	1051.7	8.20783	1040.63	10.2789	1017.43	26.984	1017.43	26.984	103.368
12BQ38-95	50.4164	38725	2.58986	13.6165	2.80689	1.84062	3.52046	0.181773	2.12486	0.603574	1076.65	21.069	1060.08	23.1663	1026.11	56.7762	1026.11	56.7762	104.926
12BQ38-80	75.6159	62320.2	1.44554	13.5771	1.54143	1.79503	2.59735	0.176758	2.0905	0.804861	1049.24	20.2424	1043.66	16.9389	1031.97	31.1735	1031.97	31.1735	101.673
12BQ38-96	129.653	99254.1	2.1009	13.4711	0.798217	1.78925	1.18818	0.174812	0.880125	0.740734	1038.57	8.4424	1041.55	7.73934	1047.83	16.1132	1047.83	16.1132	99.1162
12BQ38-23	148.82	126204	1.65421	13.2726	0.958127	1.78008	2.57959	0.171353	2.39506	0.928463	1019.56	22.5861	1038.21	16.7727	1077.69	19.2309	1077.69	19.2309	94.606
12BQ38-90	56.047	26571.7	2.6577	13.2512	2.59358	1.88104	2.8493	0.18078	1.17977	0.414056	1071.23	11.6439	1074.43	18.8915	1080.91	52.0484	1080.91	52.0484	99.1047
12BQ38-07	15.0304	17688.7	1.79706	13.1474	6.61174	1.83684	6.97706	0.17515	2.22807	0.319342	1040.42	21.4075	1058.73	45.9023	1096.67	132.479	1096.67	132.479	94.8712
12BQ38-66	20.424	26771.9	1.48319	13.0197	3.95956	2.03153	4.28329	0.191833	1.63354	0.381376	1131.3	16.9496	1126.13	29.1533	1116.19	79.05	1116.19	79.05	101.354
12BQ38-22	193.801	181107	0.927471	12.8323	0.596033	2.04409	1.08832	0.19024	0.91059	0.836697	1122.68	9.3823	1130.33	7.42053	1145.07	11.8378	1145.07	11.8378	98.0445
12BQ38-79	220.801	214542	1.69037	12.8133	0.749709	2.09378	1.82051	0.194577	1.65898	0.911269	1146.12	17.4195	1146.77	12.5109	1147.98	14.8897	1147.98	14.8897	99.8386
12BQ38-26	122.63	140946	1.83477	12.7618	0.724158	2.13677	3.24442	0.197774	3.16257	0.974772	1163.35	33.6632	1160.78	22.4446	1155.96	14.3492	1155.96	14.3492	100.639
12BQ38-12	76.9253	111312	3.02302	12.7487	0.72964	2.12906	1.47183	0.196858	1.27825	0.868474	1158.42	13.5533	1158.28	10.169	1158	14.486	1158	14.486	100.036
12BQ38-17	193.036	132421	1.62637	12.7485	0.632787	2.06533	1.78423	0.190963	1.66826	0.934997	1126.59	17.2438	1137.39	12.2072	1158.03	12.5507	1158.03	12.5507	97.285
12BQ38-09	98.1464	48598	1.21054	12.699	1.65168	2.12374	2.37222	0.1956	1.70276	0.717792	1151.64	17.958	1156.55	16.3776	1165.75	32.7295	1165.75	32.7295	98.7897
12BQ38-25	132.447	135902	2.18734	12.6907	1.19676	2.09075	1.49124	0.192436	0.88969	0.596613	1134.56	9.25567	1145.77	10.243	1167.05	23.7167	1167.05	23.7167	97.2159
12BQ38-62	114.076	152572	2.14782	12.6594	1.32095	2.1626	2.02943	0.198558	1.54068	0.759167	1167.57	16.4535	1169.11	14.0917	1171.97	26.1452	1171.97	26.1452	99.6246
12BQ38-70	84.9293	117025	1.907	12.6347	0.737761	2.11705	1.91258	0.193997	1.76456	0.922607	1142.99	18.482	1154.38	13.1905	1175.83	14.6121	1175.83	14.6121	97.207
12BQ38-50	108.375	204711	2.50445	12.0791	0.971181	2.43444	1.66051	0.21327	1.34689	0.811128	1246.22	15.2624	1252.83	11.9519	1264.22	18.9701	1264.22	18.9701	98.5761
12BQ38-27	97.4005	117043	1.3375	11.3495	0.671688	2.93038	1.71985	0.241212	1.58326	0.920582	1392.99	19.8347	1389.79	13.0207	1384.87	12.8992	1384.87	12.8992	100.587
12BQ38-33	115.587	135751	1.72816	11.2357	0.630903	2.89248	2.29744	0.235706	2.20911	0.961555	1364.33	27.164	1379.95	17.3364	1404.18	12.0841	1404.18	12.0841	97.1622
12BQ38-31	294.427	530538	2.49943	11.161	0.398146	3.01624	2.62677	0.244156	2.59642	0.988446	1408.27	32.8465	1411.73	20.0334	1416.95	7.61268	1416.95	7.61268	99.3875
12BQ38-81	142.809	397748	0.795367	11.1598	0.441829	3.10569	1.64602	0.251371	1.58561	0.963301	1445.54	20.5327	1434.1	12.6433	1417.15	8.44769	1417.15	8.44769	102.003
12BQ38-54	105.937	122313	2.33625	11.1371	0.720119	3.08862	1.48808	0.249479	1.30223	0.875109	1435.79	16.7615	1429.87	11.4146	1421.05	13.7614	1421.05	13.7614	101.037
12BQ38-24	104.389	128778	2.52877	11.1018	0.798139	3.05328	1.16835	0.245842	0.853241	0.730295	1417	10.8538	1421.05	8.93664	1427.12	15.2398	1427.12	15.2398	99.2906
12BQ38-83	469.694	83647.7	1.73691	11.0511	0.203126	2.94129	1.99635	0.235745	1.98599	0.99481	1364.54	24.4237	1392.61	15.1286	1435.84	3.87389	1435.84	3.87389	95.034
12BQ38-98	324.382	671643	1.50832	10.7214	3.82525	3.06967	4.36873	0.238693	2.11028	0.483043	1379.9	26.2143	1425.15	33.4715	1493.39	72.4153	1493.39	72.4153	92.4003
12BQ38-64	262.222	240930	1.18067	9.89817	0.378206	3.99016	1.24323	0.286447	1.18431	0.952604	1623.75	16.9995	1632.2	10.0942	1643.08	7.01843	1643.08	7.01843	98.8234
12BQ38-39	68.9038	76347.4	0.939378	9.68139	1.11778	4.31896	3.02369	0.30326	2.8095	0.929162	1707.46	42.1442	1696.99	24.9349	1684.06	20.6334	1684.06	20.6334	101.389
12BQ38-40	65.1422	83939.8	1.45545	9.6769	1.34905	4.31483	2.98629	0.30283	2.6642	0.892145	1705.32	39.921	1696.2	24.6219	1684.92	24.899	1684.92	24.899	101.211
12BQ38-78	155.64	182217	3.129	9.59868	0.445603	4.47225	1.4282	0.311341	1.35691	0.950081	1747.3	20.7678	1725.84	11.8522	1699.89	8.2078	1699.89	8.2078	102.789
12BQ38-49	842.604	222553	2.2361	9.58583	0.245465	4.18295	2.33266	0.290811	2.31971	0.994448	1645.58	33.6903	1670.69	19.1178	1702.35	4.51915	1702.35	4.51915	96.6651
12BQ38-100	347.131	303554	1.27249	9.5602	0.430175	4.18724	1.36349	0.290331	1.29385	0.948927	1643.18	18.7671	1671.53	11.1761	1707.28	7.91619	1707.28	7.91619	96.2457
12BQ38-93	79.3614	130052	1.90038	9.51566	0.46044	4.4948	2.15644	0.310204	2.10671	0.976939	1741.71	32.1541	1730.01	17.9131	1715.87	8.46585	1715.87	8.46585	101.506
12BQ38-57	321.11	76481.1	1.86373	8.80479	0.539322	5.10077	1.89779	0.325727	1.81954	0.95877	1817.64	28.8192	1836.23	16.1126	1857.36	9.74284	1857.36	9.74284	97.8611
12BQ38-02	20.5925	57686.1	0.973737	6.4746	0.870406	9.43307	3.60581	0.44296	3.49918	0.970428	2363.88	69.2487	2381.05	33.1152	2395.77	14.8066	2395.77	14.8066	98.669
12BQ38-53	83.9494	913654	0.948893	6.11791	0.31394	10.6067	1.39369	0.470632	1.35787	0.974299	2486.33	28.0128	2489.29	12.9327	2491.7	5.28962	2491.7	5.28962	99.7846
12BQ38-85	24.3306	11679.7	0.529557	5.03582	1.2475	14.9287	1.67435	0.545242	1.11677	0.66699	2805.36	25.4026	2810.7	15.935	2814.53	20.3819	2814.53	20.3819	99.674
Hell to Finish Formation (HF-1), Little Hatchet Mountains, New Mexico. (see Table 4 for location)
HF-1-16	145.704	32387.7	0.893204	19.8045	14.3444	0.198864	15.4207	0.0285639	5.66004	0.367043	181.554	10.1327	184.164	25.9785			181.554	10.1327	NA
HF-1-89	116.423	2530.05	0.746476	18.8579	10.6941	0.356471	10.9763	0.0487547	2.4726	0.225268	306.872	7.40995	309.577	29.2967			306.872	7.40995	NA
HF-1-48	576.598	2771.56	1.90477	17.9781	3.9966	0.423987	4.23802	0.0552834	1.40997	0.332695	346.878	4.76161	358.898	12.8134			346.878	4.76161	NA
HF-1-75	656.833	58708.6	1.04985	18.0248	1.70326	0.513413	4.9195	0.0671175	4.61524	0.938151	418.766	18.7127	420.742	16.9473			418.766	18.7127	NA
HF-1-53	306.087	41507.8	1.27637	17.5036	1.7285	0.652682	2.56274	0.0828566	1.89208	0.738301	513.151	9.33283	510.128	10.2769	496.622	38.0848	513.151	9.33283	103.328
HF-1-70	662.422	14331.1	1.07452	15.8503	1.50954	0.954959	5.88563	0.109779	5.68876	0.96655	671.465	36.2763	680.681	29.2005	711.274	32.0877	671.465	36.2763	94.4032
HF-1-96	377.036	100859	4.23302	13.8103	0.697408	1.67602	1.58828	0.167873	1.42698	0.89844	1000.38	13.2227	999.472	10.1009	997.464	14.1492	997.464	14.1492	100.292
HF-1-50	456.987	215783	3.90886	13.6857	0.493776	1.6797	1.5984	0.166725	1.52022	0.951088	994.04	14.0041	1000.87	10.1736	1015.84	10.0039	1015.84	10.0039	97.8539
HF-1-61	76.061	28070.3	0.809813	13.2978	4.00899	1.88784	4.35199	0.182072	1.69348	0.389128	1078.29	16.8151	1076.82	28.8953	1073.89	80.5256	1073.89	80.5256	100.41
HF-1-2	46.6167	15755.7	2.38666	13.0989	3.18221	1.84998	3.90294	0.175753	2.25974	0.578986	1043.73	21.7754	1063.42	25.73	1104.04	63.6377	1104.04	63.6377	94.5373
HF-1-25	74.6844	36117.6	1.92051	13.0149	2.73651	1.98297	3.25026	0.187178	1.75376	0.539576	1106.07	17.825	1109.73	21.9423	1116.93	54.6173	1116.93	54.6173	99.0278
HF-1-9	48.3056	11884.5	1.56593	12.4106	2.75372	2.28937	3.36877	0.206066	1.94053	0.576034	1207.83	21.3735	1209.01	23.8114	1211.13	54.2095	1211.13	54.2095	99.7271
HF-1-49	131.047	42610	1.13208	12.3682	1.89841	2.36597	2.59926	0.212234	1.77544	0.683057	1240.71	20.038	1232.39	18.5535	1217.88	37.3299	1217.88	37.3299	101.875
HF-1-22	171.651	56931.6	1.58212	12.2795	1.17051	2.29712	2.22284	0.204579	1.88969	0.850123	1199.87	20.6888	1211.4	15.7261	1232.02	22.9513	1232.02	22.9513	97.3907
HF-1-64	206.354	113819	1.26614	12.2791	0.788751	2.37478	1.68961	0.211489	1.49421	0.884351	1236.75	16.8151	1235.04	12.073	1232.08	15.4795	1232.08	15.4795	100.379
HF-1-94	77.0593	48567.2	1.45025	12.2775	2.30173	2.37617	2.98458	0.211585	1.89993	0.636582	1237.26	21.3889	1235.46	21.3319	1232.34	45.152	1232.34	45.152	100.399
HF-1-98	115.036	69737.3	1.8808	12.2735	1.77001	2.37131	2.04945	0.211083	1.0331	0.504088	1234.59	11.6076	1234	14.6382	1232.98	34.7408	1232.98	34.7408	100.13
HF-1-12	379.277	43330.9	1.05005	12.2677	0.547105	2.14096	2.15879	0.190489	2.08832	0.967354	1124.02	21.5407	1162.13	14.9423	1233.9	10.7337	1233.9	10.7337	91.0953
HF-1-33	313.161	105336	1.31306	12.2247	0.744646	2.34794	1.46745	0.208173	1.26448	0.861685	1219.07	14.0451	1226.93	10.45	1240.76	14.594	1240.76	14.594	98.252
HF-1-93	127.724	63821.7	1.33671	12.2021	1.42717	2.3876	1.91071	0.211297	1.27044	0.664905	1235.73	14.2862	1238.89	13.6748	1244.38	27.9647	1244.38	27.9647	99.3042
HF-1-32	36.758	23343.2	1.84591	11.9335	4.89307	2.53852	5.15612	0.219708	1.62588	0.31533	1280.33	18.8799	1283.15	37.576	1287.85	95.3068	1287.85	95.3068	99.4165
HF-1-71	179.952	165355	0.805186	11.755	1.00175	2.63054	1.73988	0.224267	1.42256	0.817621	1304.38	16.7988	1309.22	12.8011	1317.13	19.4212	1317.13	19.4212	99.0324
HF-1-37	110.961	27679.8	2.97385	11.5195	1.27689	2.75315	2.01069	0.230017	1.5532	0.772471	1334.59	18.7239	1342.94	14.9775	1356.25	24.6208	1356.25	24.6208	98.4029
HF-1-74	37.8051	39582.4	1.12782	11.1981	2.20421	3.16056	4.25293	0.256689	3.63716	0.855212	1472.88	47.8926	1447.58	32.8157	1410.6	42.1863	1410.6	42.1863	104.415
HF-1-84	86.2772	29099.9	1.60014	11.09	1.70744	3.09906	2.21507	0.249263	1.41108	0.637039	1434.67	18.15	1432.46	17.006	1429.15	32.5951	1429.15	32.5951	100.387
HF-1-73	56.3024	64873.8	1.61876	11.0216	2.36148	3.18467	3.60592	0.25457	2.72508	0.755724	1462	35.6463	1453.45	27.8714	1440.95	45.0118	1440.95	45.0118	101.461
HF-1-7	122.367	198328	1.67375	11.0095	1.02819	3.06283	1.8935	0.244563	1.59003	0.839728	1410.37	20.1418	1423.44	14.4951	1443.03	19.5904	1443.03	19.5904	97.7369
HF-1-56	106.419	69601.8	1.30984	11.0045	1.12584	3.15439	1.32716	0.25176	0.702726	0.529497	1447.54	9.11108	1446.07	10.2324	1443.9	21.4487	1443.9	21.4487	100.253
HF-1-76	141.579	55996.5	1.13395	10.9641	1.35639	3.12829	2.6868	0.24876	2.31928	0.863215	1432.08	29.7836	1439.68	20.6758	1450.9	25.8169	1450.9	25.8169	98.703
HF-1-62	211.446	29941.9	1.07183	10.943	0.654121	3.08788	6.67989	0.245073	6.64779	0.995194	1413.01	84.3568	1429.69	51.2779	1454.57	12.4436	1454.57	12.4436	97.143
HF-1-30	178.223	79521.6	1.51245	10.937	0.663105	3.15757	1.61714	0.250466	1.47494	0.912064	1440.88	19.0445	1446.85	12.4714	1455.62	12.6128	1455.62	12.6128	98.9873
HF-1-11	239.307	205178	1.45483	10.8766	0.650964	3.18139	1.55125	0.250963	1.40806	0.907692	1443.44	18.2098	1452.65	11.9847	1466.14	12.3643	1466.14	12.3643	98.4521
HF-1-27	228.275	123106	1.96989	10.8659	0.525456	3.27645	1.64254	0.258206	1.55622	0.94745	1480.66	20.5876	1475.48	12.7787	1468.01	9.97788	1468.01	9.97788	100.861
HF-1-95	56.7295	32412.9	0.702049	10.8192	3.18814	3.22967	3.41535	0.253426	1.22491	0.358649	1456.12	15.9653	1464.31	26.486	1476.19	60.4863	1476.19	60.4863	98.6402
HF-1-8	203.61	293940	2.96501	10.6287	0.779357	3.3357	2.04846	0.257138	1.89441	0.924798	1475.18	24.9792	1489.45	16.0038	1509.8	14.7153	1509.8	14.7153	97.7067
HF-1-15	74.898	43957.4	0.868522	10.1206	1.22903	3.84099	2.05852	0.281933	1.65136	0.802208	1601.09	23.4123	1601.38	16.5857	1601.74	22.9285	1601.74	22.9285	99.9594
HF-1-81	71.4796	44263.2	1.60557	9.96372	1.33675	3.96909	1.68023	0.286821	1.01797	0.605853	1625.62	14.6268	1627.9	13.6282	1630.82	24.8448	1630.82	24.8448	99.6811
HF-1-99	169.561	119952	1.65821	9.9007	0.635936	4.0554	1.4566	0.291205	1.31045	0.899661	1647.55	19.0521	1645.39	11.865	1642.61	11.802	1642.61	11.802	100.301
HF-1-36	92.7788	104449	1.565	9.89148	1.46716	3.96255	1.92445	0.284273	1.24537	0.647132	1612.84	17.7704	1626.56	15.6041	1644.34	27.2199	1644.34	27.2199	98.0849
HF-1-72	73.1699	73446.3	1.14283	9.88918	1.79579	3.99048	3.00549	0.28621	2.41	0.801866	1622.56	34.571	1632.26	24.4068	1644.77	33.3169	1644.77	33.3169	98.6499
HF-1-1	174.04	144497	2.55618	9.88593	0.661541	4.11324	2.62341	0.294918	2.53863	0.967683	1666.06	37.2718	1656.94	21.4313	1645.38	12.2728	1645.38	12.2728	101.257
HF-1-29	75.3102	90555.3	1.59798	9.88357	0.987203	3.93412	3.51323	0.282007	3.37168	0.959709	1601.46	47.8126	1620.73	28.4504	1645.82	18.3119	1645.82	18.3119	97.3049
HF-1-88	222.736	118667	0.918393	9.88189	0.319035	3.95351	2.0052	0.283349	1.97966	0.987262	1608.21	28.1766	1624.71	16.2516	1646.14	5.91806	1646.14	5.91806	97.6959
HF-1-63	86.9542	63527	1.3546	9.87709	1.22308	4.14048	2.24233	0.296605	1.87939	0.838143	1674.45	27.7147	1662.33	18.341	1647.04	22.6845	1647.04	22.6845	101.665
HF-1-41	93.3521	49565.5	1.74068	9.87291	0.670291	3.9917	1.49051	0.285826	1.33129	0.893177	1620.64	19.0771	1632.51	12.1031	1647.82	12.4312	1647.82	12.4312	98.3502
HF-1-79	176.936	233426	2.30907	9.86501	0.650277	3.88997	2.32545	0.278318	2.23268	0.960106	1582.89	31.3366	1611.6	18.7857	1649.31	12.0577	1649.31	12.0577	95.9729
HF-1-10	179.32	178331	1.54412	9.86243	0.758896	4.01992	1.09427	0.287541	0.788354	0.720439	1629.23	11.3496	1638.23	8.89787	1649.79	14.0693	1649.79	14.0693	98.7537
HF-1-55	249.177	179988	1.66242	9.86094	0.445611	4.03122	1.11352	0.288306	1.02047	0.916436	1633.06	14.7216	1640.52	9.05949	1650.07	8.26187	1650.07	8.26187	98.9689
HF-1-4	187.966	98326.8	1.42428	9.85774	0.608321	3.97463	1.54164	0.284166	1.41654	0.918855	1612.31	20.2069	1629.03	12.5075	1650.67	11.2778	1650.67	11.2778	97.676
HF-1-52	130.057	101078	1.84825	9.85318	0.840796	4.04187	1.63741	0.28884	1.40505	0.858095	1635.73	20.2988	1642.66	13.3292	1651.53	15.5844	1651.53	15.5844	99.0433
HF-1-57	139.95	64905.7	1.54156	9.84866	0.581522	4.01511	1.79624	0.286796	1.6995	0.946145	1625.5	24.4178	1637.26	14.603	1652.38	10.7769	1652.38	10.7769	98.3732
HF-1-68	155.086	89540.8	1.73433	9.83331	1.27984	4.08971	1.73147	0.29167	1.16619	0.673525	1649.87	16.9757	1652.25	14.1278	1655.27	23.7124	1655.27	23.7124	99.6736
HF-1-31	114.719	53197.3	1.47771	9.82875	0.867161	4.02681	1.40191	0.28705	1.10154	0.78574	1626.77	15.8373	1639.63	11.4035	1656.13	16.0637	1656.13	16.0637	98.2272
HF-1-26	199.826	25714.6	3.85391	9.82544	0.767856	4.04272	2.25214	0.288087	2.1172	0.940083	1631.96	30.5255	1642.83	18.335	1656.76	14.2228	1656.76	14.2228	98.5037
HF-1-92	167.9	101524	2.07006	9.81549	0.380705	3.96923	2.07488	0.282564	2.03966	0.983023	1604.26	28.9679	1627.93	16.8299	1658.63	7.04904	1658.63	7.04904	96.7221
HF-1-78	92.1152	68785.9	3.05617	9.78665	1.04947	4.1572	1.79104	0.295076	1.45135	0.810341	1666.85	21.3172	1665.63	14.6606	1664.08	19.4218	1664.08	19.4218	100.166
HF-1-46	95.2752	30970.1	1.78766	9.77383	1.9667	3.72829	3.25347	0.264286	2.59175	0.796611	1511.73	34.9256	1577.46	26.0542	1666.5	36.389	1666.5	36.389	90.7128
HF-1-38	58.6319	37588.6	1.48497	9.69667	1.33994	4.22476	2.74892	0.297114	2.40023	0.873154	1676.98	35.4422	1678.84	22.5735	1681.15	24.7426	1681.15	24.7426	99.7519
HF-1-66	94.5468	106340	0.854554	9.6849	1.27992	4.24144	2.03595	0.297925	1.58332	0.777681	1681.01	23.4285	1682.08	16.7301	1683.39	23.6272	1683.39	23.6272	99.8584
HF-1-5	70.0942	100564	0.985618	9.6711	1.09776	4.24165	3.1222	0.297515	2.92285	0.936151	1678.98	43.2045	1682.12	25.6596	1686.03	20.2588	1686.03	20.2588	99.5819
HF-1-39	161.333	110453	3.08317	9.54521	0.765108	4.29686	1.36359	0.297465	1.12872	0.82775	1678.73	16.6818	1692.76	11.2322	1710.17	14.0761	1710.17	14.0761	98.1614
HF-1-85	106.888	48866.1	1.29149	9.19881	1.145	4.77572	1.60575	0.318617	1.1258	0.701104	1782.97	17.536	1780.64	13.4824	1777.89	20.889	1777.89	20.889	100.286
HF-1-42	91.0407	65875.9	2.05802	9.16171	1.03416	4.69537	1.56025	0.311993	1.16829	0.74878	1750.51	17.9094	1766.41	13.0616	1785.26	18.8495	1785.26	18.8495	98.0535
HF-1-65	184.151	88092.6	5.60057	5.93679	0.680804	10.9164	3.66071	0.470035	3.59684	0.982554	2483.71	74.1415	2516.03	34.0637	2542.2	11.4107	2542.2	11.4107	97.6993
HF-1-60	135.524	136430	1.75595	5.36711	0.313539	13.3284	0.892196	0.518821	0.835289	0.936217	2694.18	18.3936	2703.2	8.42715	2709.93	5.17278	2709.93	5.17278	99.4186
Morita Formation, lower (10LM11). Quartzose petrofacies of Klute (1991). Bear Canyon, Huachuca Mountains, Arizona. (see Table 4 for location)
10LM11-38	304.49	9330.94	1.71695	19.8329	7.54154	0.144931	7.76449	0.0208471	1.84727	0.237913	133.007	2.43184	137.426	9.98018			133.007	2.43184	NA
10LM11-94	120.596	8609.98	0.807124	25.3638	23.8831	0.127758	24.5642	0.0235018	5.74434	0.233851	149.749	8.50298	122.081	28.2628			149.749	8.50298	NA
10LM11-61	226.046	14664.7	7.27186	20.8789	15.4122	0.197495	15.6593	0.0299063	2.7707	0.176937	189.962	5.18648	183.004	26.2289			189.962	5.18648	NA
10LM11-75	433.587	22143.9	4.97212	21.6349	5.42395	0.192203	6.02524	0.0301587	2.62379	0.435467	191.541	4.95172	178.507	9.86341			191.541	4.95172	NA
10LM11-70	849.441	62873.4	0.919867	19.4214	3.85634	0.220604	4.05931	0.0310736	1.26751	0.312247	197.264	2.46247	202.412	7.4495			197.264	2.46247	NA
10LM11-89	1000.2	31418.2	2.96195	19.7072	3.2953	0.21781	3.92985	0.0311316	2.14119	0.544854	197.627	4.16736	200.086	7.13693			197.627	4.16736	NA
10LM11-90	137.283	6769.23	2.18721	22.3894	17.4526	0.195123	17.6831	0.0316847	2.84558	0.160921	201.084	5.63368	180.991	29.3227			201.084	5.63368	NA
10LM11-100	304.835	36119	1.82585	20.5372	8.63339	0.217893	9.06733	0.0324552	2.77148	0.305656	205.896	5.61621	200.155	16.4734			205.896	5.61621	NA
10LM11-81	177.304	14276.8	2.32925	20.5078	11.4502	0.222584	12.439	0.0331063	4.86024	0.390726	209.96	10.0402	204.058	22.9988			209.96	10.0402	NA
10LM11-32	164.163	4405.53	2.74494	22.3895	14.3065	0.205805	14.9707	0.0334194	4.40964	0.294552	211.914	9.19273	190.026	25.9505			211.914	9.19273	NA
10LM11-24	518.822	23348.6	1.70762	19.7966	3.01035	0.234546	3.27504	0.0336757	1.28986	0.393844	213.512	2.70889	213.944	6.3179			213.512	2.70889	NA
10LM11-93	286.839	13208.1	1.51101	19.9712	10.4782	0.233323	10.8831	0.0337957	2.94121	0.270254	214.26	6.19826	212.938	20.9087			214.26	6.19826	NA
10LM11-33	582.904	8794.66	0.85411	19.1536	3.59847	0.248562	4.13766	0.034529	2.04235	0.493601	218.832	4.39431	225.408	8.3641			218.832	4.39431	NA
10LM11-87	172.687	13538.7	2.32085	20.0455	13.5934	0.23998	13.9891	0.0348891	3.30396	0.23618	221.075	7.1804	218.404	27.4971			221.075	7.1804	NA
10LM11-88	594.395	18931.3	1.18851	18.2129	6.89868	0.266018	7.82044	0.035139	3.68341	0.470998	222.632	8.06046	239.505	16.6867			222.632	8.06046	NA
10LM11-37	109.241	5482.36	0.739233	24.0872	24.1824	0.20482	24.387	0.0357813	3.15176	0.12924	226.63	7.01875	189.196	42.1198			226.63	7.01875	NA
10LM11-77	545.959	47173.7	2.86326	19.9173	2.69828	0.249922	3.05098	0.0361022	1.42398	0.466731	228.627	3.19856	226.513	6.19434			228.627	3.19856	NA
10LM11-64	247.235	16626.1	1.56349	21.1974	6.58414	0.238142	6.70044	0.0366115	1.24296	0.185505	231.795	2.82994	216.898	13.0865			231.795	2.82994	NA
10LM11-59	332.018	14518.7	1.63649	19.6852	3.94172	0.274169	4.23094	0.0391433	1.53745	0.363383	247.521	3.73338	246.022	9.24423			247.521	3.73338	NA
10LM11-31	171.505	11545.7	1.54212	20.3438	11.3997	0.270813	11.649	0.0399577	2.39679	0.205751	252.571	5.93653	243.344	25.2112			252.571	5.93653	NA
10LM11-67	609.567	70569.6	1.52443	19.8568	2.45479	0.284371	3.57576	0.0409536	2.60002	0.727123	258.741	6.59411	254.119	8.039			258.741	6.59411	NA
10LM11-17	114.721	33072.3	3.54203	14.0502	2.63246	1.55634	3.19467	0.158594	1.80998	0.566563	948.956	15.9716	953.014	19.7513	962.412	53.7778	962.412	53.7778	98.6019
10LM11-16	52.3338	14016.9	2.25432	13.7553	4.47041	1.67372	5.4568	0.166976	3.12924	0.573457	995.426	28.8636	998.601	34.698	1005.56	90.7518	1005.56	90.7518	98.9923
10LM11-76	375.67	191467	4.76579	13.654	1.10892	1.71069	1.30648	0.169406	0.690785	0.528738	1008.84	6.45097	1012.54	8.37209	1020.55	22.4507	1020.55	22.4507	98.8527
10LM11-22	128.106	23779.5	3.69268	13.6205	2.09178	1.74524	2.41118	0.172404	1.19928	0.497381	1025.34	11.3686	1025.4	15.5657	1025.52	42.3203	1025.52	42.3203	99.9829
10LM11-97	91.6317	28494.6	1.99597	13.5668	2.33442	1.82134	2.82925	0.179212	1.59848	0.564982	1062.67	15.6603	1053.17	18.5475	1033.5	47.1611	1033.5	47.1611	102.822
10LM11-51	490.73	127709	1.79038	13.2532	0.581769	1.85376	1.27257	0.178186	1.13181	0.889385	1057.06	11.0345	1064.77	8.3938	1080.62	11.6532	1080.62	11.6532	97.8195
10LM11-5	48.1563	11421.8	1.54447	13.1514	2.34055	2.01338	2.76317	0.192043	1.46865	0.53151	1132.43	15.2526	1120.03	18.7482	1096.05	46.8554	1096.05	46.8554	103.319
10LM11-14	112.736	38356	1.78264	13.1214	1.86282	1.83558	3.79784	0.174684	3.3096	0.871444	1037.87	31.727	1058.28	24.9681	1100.62	37.2654	1100.62	37.2654	94.2984
10LM11-35	343.91	334405	2.87347	13.0647	0.744264	1.89743	1.69835	0.179789	1.52658	0.898864	1065.82	14.9968	1080.19	11.2935	1109.27	14.8507	1109.27	14.8507	96.0836
10LM11-98	51.9563	23422.7	2.39659	12.8989	2.81342	2.01285	5.96156	0.188305	5.25594	0.881638	1112.19	53.6924	1119.85	40.4626	1134.74	56.0134	1134.74	56.0134	98.0127
10LM11-80	900.785	522738	4.01448	12.7474	0.469469	2.12107	1.58641	0.196099	1.51535	0.955209	1154.33	16.0155	1155.68	10.9475	1158.2	9.29296	1158.2	9.29296	99.6657
10LM11-36	144.009	58423.4	2.27941	12.7069	2.23261	2.06166	2.35152	0.190002	0.738291	0.313964	1121.38	7.59899	1136.17	16.0796	1164.51	44.2459	1164.51	44.2459	96.2965
10LM11-10	51.36	22314	1.84921	12.6694	4.52088	2.20268	4.88332	0.202398	1.84619	0.37806	1188.19	20.0334	1181.89	34.115	1170.37	89.554	1170.37	89.554	101.523
10LM11-53	326.803	81361.2	1.39498	12.4877	0.627173	2.22364	1.81443	0.201393	1.70258	0.93836	1182.8	18.3987	1188.52	12.709	1198.91	12.3469	1198.91	12.3469	98.6561
10LM11-79	717.702	418353	2.20589	12.225	0.328689	2.41084	1.41504	0.213755	1.37634	0.972648	1248.79	15.6253	1245.83	10.156	1240.72	6.44108	1240.72	6.44108	100.651
10LM11-66	840.982	174021	2.54945	12.065	0.529761	2.46547	1.49937	0.215738	1.40267	0.935502	1259.31	16.0457	1261.97	10.8316	1266.51	10.3252	1266.51	10.3252	99.4318
10LM11-49	410.444	140470	0.69734	12.0224	0.408033	2.53625	0.663798	0.221148	0.523581	0.788765	1287.94	6.11247	1282.5	4.83413	1273.4	7.9584	1273.4	7.9584	101.141
10LM11-73	418.991	9931.9	7.77854	11.9734	0.723267	2.43427	1.53766	0.21139	1.35694	0.882471	1236.22	15.2645	1252.78	11.0673	1281.34	14.0737	1281.34	14.0737	96.4784
10LM11-12	187.892	7251.97	2.18421	11.8083	2.04027	2.39987	3.15804	0.205529	2.4105	0.76329	1204.95	26.4925	1242.56	22.6383	1308.35	39.6009	1308.35	39.6009	92.0971
10LM11-3	46.4659	17157.1	4.45928	11.324	3.19526	2.84866	3.92693	0.23396	2.28278	0.581315	1355.22	27.9013	1368.46	29.5213	1389.17	61.3442	1389.17	61.3442	97.5559
10LM11-92	151.829	60930.8	1.28692	11.2289	1.21346	2.94784	2.41364	0.240071	2.08642	0.864431	1387.07	26.0385	1394.29	18.3018	1405.34	23.2391	1405.34	23.2391	98.6994
10LM11-2	180.473	73407.3	1.8303	11.2045	0.801696	2.95205	1.34508	0.239891	1.08006	0.802969	1386.13	13.4709	1395.38	10.2022	1409.52	15.3444	1409.52	15.3444	98.341
10LM11-25	138.895	67305.7	3.36143	11.202	1.81813	2.9741	2.35518	0.241629	1.49709	0.635657	1395.16	18.7812	1401.02	17.8985	1409.94	34.799	1409.94	34.799	98.9515
10LM11-6	328.847	60622.6	2.54566	11.1931	1.09334	2.80367	4.91147	0.227601	4.78823	0.974908	1321.91	57.2298	1356.52	36.7752	1411.46	20.9212	1411.46	20.9212	93.6557
10LM11-57	305.946	64170.8	2.27415	11.1258	0.521318	3.00105	1.99578	0.242161	1.92649	0.965282	1397.92	24.211	1407.89	15.2011	1422.99	9.95964	1422.99	9.95964	98.2385
10LM11-28	28.101	11495.7	1.52501	11.1158	4.90738	2.99501	5.29102	0.241455	1.97801	0.373843	1394.26	24.8002	1406.35	40.2974	1424.71	93.7872	1424.71	93.7872	97.8626
10LM11-96	229.953	155378	3.52659	11.1136	0.580269	3.19841	1.39015	0.257803	1.26325	0.908716	1478.59	16.6911	1456.78	10.7537	1425.09	11.0828	1425.09	11.0828	103.755
10LM11-7	227.886	121449	2.94447	11.1129	0.82636	3.16158	1.71918	0.254817	1.50755	0.876901	1463.27	19.7352	1447.83	13.2624	1425.21	15.7828	1425.21	15.7828	102.671
10LM11-55	291.636	134284	0.852598	11.1058	0.963882	3.02015	1.47919	0.243264	1.12203	0.75854	1403.64	14.1526	1412.72	11.2839	1426.42	18.4064	1426.42	18.4064	98.403
10LM11-19	231.941	132441	3.44115	11.0954	1.13961	2.97577	2.0941	0.239464	1.75686	0.838955	1383.91	21.8808	1401.45	15.9163	1428.22	21.7571	1428.22	21.7571	96.8976
10LM11-62	272.298	5960.54	2.36647	11.0938	1.15987	2.8995	3.66521	0.233293	3.47684	0.948607	1351.74	42.398	1381.78	27.679	1428.49	22.1431	1428.49	22.1431	94.6269
10LM11-65	238.683	48916.3	3.15908	11.0883	0.826025	3.20697	1.79438	0.257904	1.59295	0.887743	1479.11	21.0539	1458.85	13.8898	1429.44	15.7674	1429.44	15.7674	103.475
10LM11-58	444.529	105810	2.34939	11.078	0.446285	2.99029	2.10477	0.240255	2.05691	0.977262	1388.02	25.6861	1405.15	16.0169	1431.21	8.51664	1431.21	8.51664	96.9824
10LM11-39	170.347	103113	1.78087	11.036	0.955341	3.14269	1.64821	0.251542	1.34311	0.814885	1446.42	17.4018	1443.21	12.6965	1438.46	18.2136	1438.46	18.2136	100.554
10LM11-50	106.516	70917.8	1.75693	11.0202	1.64071	3.11109	1.96567	0.248656	1.08256	0.550732	1431.54	13.8972	1435.43	15.1053	1441.19	31.2701	1441.19	31.2701	99.3306
10LM11-91	249.014	50896.6	2.49964	11.0178	0.610776	3.15793	1.0411	0.252346	0.843114	0.80983	1450.57	10.9516	1446.94	8.02891	1441.59	11.6394	1441.59	11.6394	100.622
10LM11-52	372.357	30069.2	0.820144	11.0144	1.14324	3.2378	4.08561	0.258648	3.92239	0.960052	1482.92	51.9617	1466.26	31.7057	1442.19	21.7851	1442.19	21.7851	102.824
10LM11-78	327.497	131201	2.42417	11.0098	0.59288	3.24693	1.8055	0.259271	1.70538	0.944548	1486.11	22.6348	1468.44	14.017	1442.98	11.2962	1442.98	11.2962	102.989
10LM11-46	61.6646	98487.4	0.995056	10.9851	3.17294	3.17694	4.64425	0.253111	3.39139	0.730235	1454.5	44.1596	1451.57	35.8821	1447.27	60.4338	1447.27	60.4338	100.5
10LM11-68	150.608	48117.4	1.45778	10.9606	1.17956	3.13054	1.45896	0.248859	0.858614	0.588509	1432.59	11.0295	1440.23	11.2281	1451.51	22.449	1451.51	22.449	98.6966
10LM11-40	154.673	35109.9	2.3887	10.9167	0.666569	3.11924	1.84041	0.246968	1.71546	0.932107	1422.82	21.9021	1437.45	14.1516	1459.14	12.6726	1459.14	12.6726	97.5108
10LM11-1	163.077	48873.2	0.916428	10.8999	1.60432	3.11163	1.97504	0.245985	1.15193	0.583245	1417.74	14.6603	1435.57	15.1779	1462.08	30.4904	1462.08	30.4904	96.9674
10LM11-9	252.51	257317	1.71726	10.894	0.86522	3.14621	2.76784	0.248584	2.62913	0.949886	1431.17	33.7435	1444.07	21.329	1463.1	16.4407	1463.1	16.4407	97.8178
10LM11-74	109.775	133901	2.42925	10.5938	0.842365	3.46623	1.74363	0.266322	1.52666	0.87556	1522.11	20.6978	1519.56	13.7413	1516.01	15.8921	1516.01	15.8921	100.402
10LM11-48	362.881	313450	3.79932	10.5345	0.977494	3.50034	2.29367	0.267437	2.07495	0.904643	1527.78	28.2244	1527.29	18.1164	1526.59	18.4159	1526.59	18.4159	100.078
10LM11-82	182.548	62468.7	3.72256	10.3287	1.20582	3.67192	1.70913	0.275066	1.21125	0.708691	1566.47	16.8444	1565.28	13.6405	1563.67	22.6075	1563.67	22.6075	100.179
10LM11-83	82.1156	38612.5	2.3503	10.0879	1.98334	3.62244	2.91241	0.265035	2.13272	0.732286	1515.55	28.8041	1554.47	23.1786	1607.76	36.9736	1607.76	36.9736	94.2645
10LM11-43	60.9525	35638.8	1.34237	9.97445	2.1152	3.91543	2.40484	0.283249	1.14419	0.475788	1607.7	16.2808	1616.88	19.4531	1628.82	39.3252	1628.82	39.3252	98.7033
10LM11-47	201.215	122977	4.29635	9.94167	0.67272	4.11512	1.524	0.296715	1.36749	0.897302	1675	20.1716	1657.31	12.4498	1634.94	12.497	1634.94	12.497	102.45
10LM11-54	1631.57	672023	2.43214	9.92175	0.122016	4.18576	2.09725	0.301204	2.09369	0.998306	1697.28	31.2428	1671.24	17.1903	1638.66	2.26556	1638.66	2.26556	103.577
10LM11-42	135.236	48875.3	2.03561	9.8698	1.05238	4.06982	1.97115	0.291328	1.66672	0.845554	1648.16	24.2397	1648.28	16.0683	1648.41	19.5146	1648.41	19.5146	99.9851
10LM11-13	581.699	505620	10.6939	9.61821	0.216332	4.55028	2.26872	0.317418	2.25838	0.995443	1777.11	35.0774	1740.21	18.8879	1696.14	3.98743	1696.14	3.98743	104.774
10LM11-63	138.695	156995	2.42709	9.55433	1.2178	4.4043	1.80472	0.305194	1.33191	0.738014	1717.01	20.0768	1713.15	14.9351	1708.41	22.4109	1708.41	22.4109	100.503
10LM11-71	74.7146	16912.3	1.62237	9.49617	1.59772	4.41263	2.62585	0.30391	2.08384	0.793586	1710.67	31.31	1714.71	21.7398	1719.64	29.3607	1719.64	29.3607	99.4782
10LM11-18	273.748	92041.7	4.10196	9.45759	0.379127	4.51408	4.9387	0.309634	4.92412	0.997049	1738.91	75.0525	1733.57	41.0748	1727.12	6.96092	1727.12	6.96092	100.683
10LM11-8	67.3842	60248	2.21171	9.42953	2.04528	4.35832	2.19011	0.298063	0.783205	0.35761	1681.7	11.5933	1704.47	18.0897	1732.57	37.5269	1732.57	37.5269	97.0637
10LM11-20	1113.31	535435	2.50302	9.40753	0.150694	4.31468	2.10055	0.29439	2.09514	0.997423	1663.43	30.718	1696.17	17.3172	1736.86	2.76341	1736.86	2.76341	95.7725
10LM11-45	485.978	258873	2.58714	9.40039	0.373951	4.62633	1.14547	0.315414	1.08271	0.945211	1767.29	16.736	1754.03	9.56398	1738.25	6.85454	1738.25	6.85454	101.671
10LM11-34	186.051	204816	4.71708	7.70311	0.491823	6.76583	1.47658	0.377995	1.39226	0.942898	2066.91	24.6195	2081.26	13.063	2095.48	8.6429	2095.48	8.6429	98.6364
10LM11-26	64.6276	145309	1.20559	5.38037	1.15648	13.1841	2.56767	0.514473	2.29248	0.892827	2675.7	50.2034	2692.92	24.2382	2705.86	19.0843	2705.86	19.0843	98.8851
10LM11-70	230.29	244678	5.54198	5.30807	0.30555	13.6511	1.22432	0.525537	1.18558	0.968358	2722.62	26.3289	2725.81	11.5836	2728.17	5.03232	2728.17	5.03232	99.7967
Morita Formation, (11BC1). Volcaniclastic petrofacies of Klute (1991). Bear Canyon, Huachuca Mountains, Arizona. (see Table 4 for location)
11-BC-1-21	303.146	11650.8	2.48591	20.1937	14.0131	0.127926	14.4153	0.0187359	3.38124	0.23456	119.662	4.00873	122.232	16.6023			119.662	4.00873	NA
11-BC-1-36	284.125	13756.2	1.13086	20.5943	8.66789	0.126072	9.09011	0.0188306	2.73821	0.301229	120.261	3.26248	120.562	10.3339			120.261	3.26248	NA
11-BC-1-62	228.475	16013.1	2.63796	24.3039	15.4518	0.10686	15.7965	0.0188361	3.28201	0.207768	120.296	3.9115	103.089	15.4863			120.296	3.9115	NA
11-BC-1-81	184.539	9474.89	2.32815	21.5299	12.1629	0.120698	12.3268	0.0188469	2.00328	0.162515	120.364	2.38886	115.704	13.4808			120.364	2.38886	NA
11-BC-1-3	344.991	19028.6	4.06587	20.8776	6.13715	0.12452	6.54512	0.0188547	2.27466	0.347534	120.414	2.71357	119.162	7.35916			120.414	2.71357	NA
11-BC-1-67	2240.33	20308.7	4.68588	20.5635	1.70766	0.126489	2.27144	0.0188647	1.49777	0.659394	120.477	1.78771	120.938	2.58976			120.477	1.78771	NA
11-BC-1-96	333.038	19976.7	0.809379	20.6106	8.42688	0.126407	8.95781	0.0188957	3.03808	0.339155	120.673	3.63204	120.864	10.2076			120.673	3.63204	NA
11-BC-1-12	559.658	19563.5	0.71458	21.1313	8.04093	0.123397	8.27041	0.0189117	1.93474	0.233935	120.774	2.31491	118.148	9.22448			120.774	2.31491	NA
11-BC-1-59	457.962	13473.7	0.999837	20.8557	5.98979	0.125159	7.02847	0.0189315	3.6772	0.523186	120.899	4.40428	119.738	7.93865			120.899	4.40428	NA
11-BC-1-98	390.143	12030.5	0.75566	21.7565	6.08253	0.120147	6.33657	0.0189584	1.7762	0.280309	121.07	2.13036	115.205	6.90127			121.07	2.13036	NA
11-BC-1-54	269.034	12386.5	1.54547	19.6961	11.8129	0.133023	12.1398	0.0190023	2.79837	0.230512	121.348	3.364	126.811	14.4731			121.348	3.364	NA
11-BC-1-23	338.348	13902.6	1.22306	21.1755	5.80209	0.123745	6.20801	0.0190047	2.20796	0.355663	121.363	2.65458	118.462	6.94145			121.363	2.65458	NA
11-BC-1-11	214.448	5836.71	1.54675	20.3632	16.1193	0.128838	16.3032	0.0190277	2.44195	0.149783	121.508	2.93938	123.053	18.8957			121.508	2.93938	NA
11-BC-1-39	263.798	13672.7	1.37202	22.0302	14.7622	0.11925	14.9224	0.0190535	2.18066	0.146133	121.671	2.62835	114.392	16.1449			121.671	2.62835	NA
11-BC-1-56	278.905	13422.1	1.07172	20.631	15.8326	0.12781	16.1986	0.0191243	3.42409	0.211382	122.119	4.14211	122.128	18.6417			122.119	4.14211	NA
11-BC-1-100	55.6281	4455.13	1.64675	17.3211	40.1188	0.152331	41.0273	0.0191366	8.58651	0.209287	122.197	10.3936	143.968	55.1241			122.197	10.3936	NA
11-BC-1-77	324.214	1935.3	1.34883	20.6027	9.27002	0.128158	9.73256	0.01915	2.9647	0.304617	122.282	3.59113	122.442	11.2267			122.282	3.59113	NA
11-BC-1-93	427.17	19804.3	1.67253	20.4255	5.70874	0.12927	5.83931	0.01915	1.22794	0.210289	122.282	1.4874	123.442	6.78732			122.282	1.4874	NA
11-BC-1-65	777.136	35369.3	2.29749	20.3833	4.60834	0.129617	4.83335	0.0191618	1.45753	0.301557	122.356	1.76656	123.754	5.63137			122.356	1.76656	NA
11-BC-1-78	376.916	11619.3	1.36013	22.3549	10.002	0.11821	10.4541	0.0191657	3.04096	0.290888	122.381	3.68645	113.448	11.2218			122.381	3.68645	NA
11-BC-1-50	291.083	34162.2	1.55416	20.1465	8.17058	0.131385	8.44694	0.0191975	2.14299	0.253701	122.582	2.6021	125.341	9.96041			122.582	2.6021	NA
11-BC-1-60	94.4892	5482.25	3.05	17.4149	39.165	0.152023	39.5	0.0192013	5.13308	0.129951	122.606	6.23399	143.697	52.9748			122.606	6.23399	NA
11-BC-1-92	318.426	14941.8	1.07228	20.8425	9.14338	0.127169	9.65705	0.0192234	3.10762	0.321798	122.746	3.77839	121.551	11.0633			122.746	3.77839	NA
11-BC-1-71	457.167	18355.4	0.994687	20.3017	3.98199	0.130583	4.65828	0.0192273	2.4173	0.518925	122.771	2.93965	124.622	5.46317			122.771	2.93965	NA
11-BC-1-53	293.884	14157.9	1.22693	24.0275	11.8845	0.110377	12.2202	0.0192347	2.84487	0.2328	122.817	3.46092	106.31	12.335			122.817	3.46092	NA
11-BC-1-28	78.9902	20176.9	1.56739	21.1025	33.0558	0.125819	33.5185	0.0192566	5.54955	0.165567	122.956	6.75885	120.334	38.0536			122.956	6.75885	NA
11-BC-1-31	119.245	6509.03	1.18937	57.0791	125.53	0.0465519	125.619	0.0192714	4.71052	0.0374986	123.049	5.7413	46.2008	56.7954			123.049	5.7413	NA
11-BC-1-99	336.898	12052.9	1.38715	20.6368	8.13598	0.129292	8.27286	0.0193515	1.49866	0.181154	123.556	1.83405	123.462	9.61757			123.556	1.83405	NA
11-BC-1-6	374.656	48697.5	0.912246	20.4456	5.71648	0.130593	6.44553	0.0193651	2.9777	0.461979	123.642	3.6466	124.63	7.55979			123.642	3.6466	NA
11-BC-1-2	455.414	15012.7	1.56587	19.04	5.95008	0.140496	6.62118	0.0194012	2.90457	0.438678	123.87	3.56355	133.485	8.28217			123.87	3.56355	NA
11-BC-1-15	256.214	9142.22	1.45424	20.8895	8.84087	0.128064	9.1077	0.0194023	2.18841	0.240282	123.877	2.68507	122.357	10.499			123.877	2.68507	NA
11-BC-1-84	494.119	36684.4	0.873525	20.2339	5.48202	0.132229	5.75414	0.0194046	1.74858	0.303882	123.892	2.14567	126.099	6.82354			123.892	2.14567	NA
11-BC-1-44	299.273	12611.9	1.56298	21.3006	11.2934	0.125687	11.4552	0.019417	1.91808	0.167442	123.97	2.35513	120.215	12.9876			123.97	2.35513	NA
11-BC-1-80	338.409	22685.8	1.38811	19.863	6.47399	0.135035	7.03962	0.0194531	2.76472	0.392738	124.199	3.40088	128.612	8.50405			124.199	3.40088	NA
11-BC-1-9	277.526	15923.5	1.35208	19.9813	16.5758	0.134742	16.6838	0.0195266	1.89594	0.113639	124.663	2.34083	128.35	20.1182			124.663	2.34083	NA
11-BC-1-17	169.428	1560.7	1.29603	23.2618	24.5025	0.115772	24.9112	0.0195319	4.49392	0.180397	124.697	5.54992	111.231	26.2512			124.697	5.54992	NA
11-BC-1-38	261.393	10512.9	1.69577	20.7822	7.17108	0.129704	8.04959	0.0195499	3.65671	0.454273	124.81	4.52006	123.831	9.38434			124.81	4.52006	NA
11-BC-1-57	524.544	47326.2	2.41036	21.1967	8.09669	0.127175	8.23208	0.0195511	1.48686	0.180618	124.818	1.83802	121.556	9.43112			124.818	1.83802	NA
11-BC-1-91	308.557	11670.8	1.18364	22.8985	4.77176	0.117768	5.4336	0.0195584	2.59891	0.478303	124.864	3.21389	113.047	5.81297			124.864	3.21389	NA
11-BC-1-61	161.264	7882.6	2.96056	19.7568	19.862	0.136694	20.4696	0.0195868	4.95042	0.241842	125.044	6.13054	130.095	24.9995			125.044	6.13054	NA
11-BC-1-87	318.993	22855	1.72234	20.3551	10.518	0.132801	10.9869	0.0196053	3.17545	0.289022	125.161	3.93609	126.612	13.0791			125.161	3.93609	NA
11-BC-1-85	141.455	6574.38	2.15509	31.4076	18.2484	0.0864093	18.7173	0.0196831	4.16348	0.22244	125.653	5.18087	84.153	15.1172			125.653	5.18087	NA
11-BC-1-10	189.507	12924.9	1.72051	21.3975	14.828	0.126987	15.4466	0.0197071	4.32733	0.280148	125.804	5.39119	121.387	17.6745			125.804	5.39119	NA
11-BC-1-83	1183.26	150089	2.27342	20.6502	2.89159	0.131672	3.35863	0.0197204	1.70855	0.508703	125.888	2.13	125.599	3.96796			125.888	2.13	NA
11-BC-1-76	320.984	9109.35	1.29886	20.8385	10.186	0.13147	10.6317	0.0198696	3.04577	0.286481	126.832	3.82526	125.417	12.544			126.832	3.82526	NA
11-BC-1-33	150.009	17945.5	1.24503	20.8965	26.0581	0.131557	26.6083	0.0199383	5.38286	0.2023	127.266	6.78339	125.496	31.4213			127.266	6.78339	NA
11-BC-1-95	335.578	14817.1	1.12294	20.5058	6.54761	0.140314	7.50977	0.0208677	3.67769	0.489721	133.137	4.84617	133.323	9.38306			133.137	4.84617	NA
11-BC-1-42	542.973	23076.9	1.58939	20.0712	5.20796	0.151305	5.46827	0.0220255	1.66708	0.304865	140.444	2.316	143.063	7.2971			140.444	2.316	NA
11-BC-1-68	216.103	12336.9	1.98701	19.8299	7.96661	0.154139	9.27599	0.0221683	4.75154	0.512241	141.345	6.64296	145.559	12.5796			141.345	6.64296	NA
11-BC-1-55	185.984	8107.86	1.07511	21.132	19.9222	0.148347	20.1464	0.0227362	2.99685	0.148754	144.926	4.29475	140.451	26.432			144.926	4.29475	NA
11-BC-1-94	77.9355	12154.3	1.51875	22.6512	34.5636	0.139046	34.901	0.0228428	4.84136	0.138717	145.598	6.9699	132.194	43.2862			145.598	6.9699	NA
11-BC-1-26	428.434	20157.1	1.741	21.2919	6.04107	0.147996	6.29072	0.022854	1.7546	0.278919	145.668	2.52724	140.141	8.23473			145.668	2.52724	NA
11-BC-1-7	482.425	17611.4	1.17472	20.7367	4.70736	0.152008	5.46488	0.0228615	2.77591	0.507954	145.715	3.99955	143.683	7.32199			145.715	3.99955	NA
11-BC-1-66	226.809	14279.6	1.78338	19.5206	10.0314	0.161532	10.5126	0.0228693	3.14435	0.299102	145.764	4.53191	152.044	14.8457			145.764	4.53191	NA
11-BC-1-70	348.487	16766.9	0.936353	20.8054	12.4794	0.152462	12.654	0.0230057	2.09463	0.165531	146.624	3.03657	144.083	16.9994			146.624	3.03657	NA
11-BC-1-58	59.2014	3580.6	1.14147	23.2062	34.6208	0.136791	35.2053	0.0230228	6.38858	0.181467	146.732	9.26821	130.181	43.0401			146.732	9.26821	NA
11-BC-1-74	248.263	30362.1	0.999634	20.5908	10.1428	0.15507	10.3228	0.0231579	1.91922	0.185922	147.583	2.80028	146.379	14.0726			147.583	2.80028	NA
11-BC-1-49	237.27	22432.7	1.35199	19.5014	10.9609	0.163779	11.3845	0.0231645	3.07651	0.270238	147.625	4.49009	154.006	16.2693			147.625	4.49009	NA
11-BC-1-47	88.3244	3759.68	1.31714	19.7433	34.6583	0.162797	35.367	0.0233112	7.04418	0.199174	148.549	10.3444	153.149	50.3184			148.549	10.3444	NA
11-BC-1-20	231.503	35081.1	1.59569	20.5259	10.6086	0.156988	10.8126	0.0233704	2.09019	0.193311	148.922	3.07707	148.063	14.898			148.922	3.07707	NA
11-BC-1-64	310.863	24650.8	0.983643	20.8099	8.01297	0.155043	8.40681	0.0234003	2.54299	0.302491	149.11	3.74834	146.355	11.4587			149.11	3.74834	NA
11-BC-1-75	78.7007	2953.69	1.02122	26.4461	40.4019	0.122482	40.918	0.0234927	6.47806	0.158318	149.692	9.58543	117.32	45.3655			149.692	9.58543	NA
11-BC-1-73	498.118	41859.3	1.87451	19.2894	2.61369	0.168792	3.02529	0.023614	1.52348	0.503582	150.456	2.26563	158.37	4.43624			150.456	2.26563	NA
11-BC-1-82	215.813	10176.7	0.551436	20.1913	13.6697	0.161365	14.0914	0.0236304	3.42157	0.242813	150.559	5.09181	151.897	19.8829			150.559	5.09181	NA
11-BC-1-45	102.381	14963.2	1.12549	19.8837	13.2005	0.164744	14.0154	0.0237577	4.70939	0.336015	151.361	7.04515	154.847	20.1312			151.361	7.04515	NA
11-BC-1-43	770.958	30234.2	1.9918	20.7878	3.68611	0.157784	4.474	0.0237887	2.53559	0.56674	151.556	3.79802	148.762	6.19109			151.556	3.79802	NA
11-BC-1-46	85.5654	5949.77	1.80206	19.196	15.9657	0.170868	18.0423	0.0237887	8.40351	0.465768	151.556	12.5875	160.172	26.7409			151.556	12.5875	NA
11-BC-1-90	344.95	19720.3	1.65528	22.6258	9.13634	0.145799	9.52309	0.0239254	2.68638	0.282091	152.417	4.04647	138.196	12.3049			152.417	4.04647	NA
11-BC-1-34	130.36	5480.38	0.796428	19.5799	21.0215	0.169092	21.2904	0.0240122	3.37304	0.158431	152.963	5.09878	158.63	31.2769			152.963	5.09878	NA
11-BC-1-63	327.715	22102	1.18597	20.9015	13.1275	0.159622	13.6953	0.0241974	3.90276	0.28497	154.129	5.94395	150.372	19.1439			154.129	5.94395	NA
11-BC-1-52	2315.38	145523	0.585812	20.3119	1.15722	0.171925	1.65848	0.0253273	1.18803	0.716335	161.237	1.89179	161.088	2.47048			161.237	1.89179	NA
11-BC-1-13	208.97	9171.96	2.09405	21.6087	15.714	0.1621	15.9197	0.0254045	2.551	0.160241	161.722	4.07421	152.539	22.5516			161.722	4.07421	NA
11-BC-1-51	319.382	18630.1	1.83657	20.877	6.26619	0.171316	6.47916	0.0259396	1.64753	0.254281	165.086	2.6853	160.56	9.62245			165.086	2.6853	NA
11-BC-1-27	560.313	26300.8	1.64337	20.5925	3.55129	0.176012	3.7986	0.0262875	1.34821	0.354922	167.271	2.22616	164.623	5.77282			167.271	2.22616	NA
11-BC-1-16	327.264	17358.2	1.94644	20.6766	6.29403	0.175433	7.31206	0.0263081	3.72174	0.508987	167.4	6.15001	164.123	11.0815			167.4	6.15001	NA
11-BC-1-18	516.576	89387.9	1.87753	20.2649	4.59425	0.181738	5.03589	0.0267109	2.0623	0.40952	169.93	3.45868	169.555	7.86392			169.93	3.45868	NA
11-BC-1-35	416.674	17825.2	1.62249	20.9581	8.08157	0.178124	8.52097	0.0270752	2.70097	0.316979	172.217	4.58994	166.445	13.082			172.217	4.58994	NA
11-BC-1-22	443.926	21438.4	1.63534	20.0639	4.37379	0.187735	5.04499	0.0273187	2.51432	0.498381	173.745	4.31017	174.695	8.09703			173.745	4.31017	NA
11-BC-1-40	337.108	22761.2	1.81528	20.736	7.12235	0.181712	7.60115	0.0273279	2.65511	0.349304	173.803	4.553	169.532	11.8686			173.803	4.553	NA
11-BC-1-41	646.344	27505.1	2.28574	20.2985	3.81071	0.190061	4.32601	0.0279805	2.04764	0.473332	177.896	3.59287	176.681	7.01531			177.896	3.59287	NA
11-BC-1-97	540.422	30538.7	2.07984	19.7315	2.23262	0.198256	2.77564	0.0283717	1.64912	0.59414	180.349	2.93295	183.649	4.66308			180.349	2.93295	NA
11-BC-1-14	165.125	44396.4	2.83637	18.1435	4.19005	0.494579	4.64107	0.065081	1.99574	0.430018	406.452	7.8613	408.026	15.5955			406.452	7.8613	97.4888
11-BC-1-30	732.07	112025	9.87273	17.8202	1.41768	0.541948	2.2902	0.0700436	1.79866	0.785373	436.418	7.58987	439.708	8.17334			436.418	7.58987	95.4998
11-BC-1-1	271.129	65052.1	4.41243	16.981	1.79023	0.720354	2.27434	0.0887171	1.40275	0.616771	547.946	7.3687	550.876	9.67001	562.989	39.0057	547.946	7.3687	97.328
11-BC-1-25	148.504	77156.1	1.30826	17.22	3.21023	0.724436	3.51566	0.0904757	1.43328	0.407685	558.35	7.66594	553.283	14.9976	532.501	70.2964	558.35	7.66594	104.854
11-BC-1-79	23.2295	7063.83	0.559997	17.1237	19.6471	0.773601	20.2427	0.0960756	4.87426	0.240791	591.369	27.5424	581.827	89.8858	544.756	433.143	591.369	27.5424	108.557
11-BC-1-72	45.2082	12742.4	1.22733	14.3497	5.29752	1.37437	5.81737	0.143036	2.40378	0.413207	861.809	19.391	878.035	34.204	919.188	108.983	861.809	19.391	93.7576
11-BC-1-29	202.269	72951.9	40.5136	13.5613	1.29292	1.75353	2.00431	0.172469	1.53154	0.764122	1025.7	14.523	1028.46	12.9611	1034.33	26.1408	1034.33	26.1408	99.1659
11-BC-1-19	75.6583	29875.2	2.10547	13.1836	2.15025	1.95163	3.08198	0.186608	2.20795	0.716406	1102.97	22.3838	1099.01	20.6946	1091.14	43.0585	1091.14	43.0585	101.084
11-BC-1-69	93.9692	50563.5	5.05887	13.1193	0.863684	1.91372	2.51393	0.182091	2.36091	0.939131	1078.39	23.4442	1085.88	16.7669	1100.93	17.2941	1100.93	17.2941	97.9524
11-BC-1-4	116.242	51442.5	2.22463	11.7889	1.86274	2.6218	2.35608	0.224168	1.44267	0.61232	1303.86	17.0302	1306.77	17.3196	1311.53	36.144	1311.53	36.144	99.4152
11-BC-1-8	243.097	166860	1.76011	11.3993	0.523826	2.91967	1.21794	0.241385	1.09954	0.902786	1393.89	13.7827	1387.02	9.21198	1376.44	10.0726	1376.44	10.0726	101.268
11-BC-1-24	479.086	103798	2.95989	10.9827	0.405177	3.10765	1.55434	0.247536	1.5006	0.965427	1425.76	19.1942	1434.58	11.9408	1447.68	7.71497	1447.68	7.71497	98.4853
11-BC-1-86	187.828	151610	3.25497	10.683	0.387568	3.44208	1.51976	0.266693	1.46951	0.966936	1523.99	19.9449	1514.06	11.958	1500.18	7.32789	1500.18	7.32789	101.587
11-BC-1-5	93.2527	130131	1.49695	9.90054	1.15082	4.01897	1.83844	0.288584	1.4337	0.779844	1634.45	20.6984	1638.04	14.949	1642.64	21.3561	1642.64	21.3561	99.5015
11-BC-1-37	25.0299	25339.5	1.38476	9.80724	3.19077	4.14225	3.5597	0.294633	1.57812	0.443328	1664.64	23.1523	1662.68	29.1237	1660.19	59.0922	1660.19	59.0922	100.268
11-BC-1-89	226.803	266179	1.23924	9.56568	0.463297	4.43256	2.30466	0.307517	2.25761	0.979586	1728.47	34.2289	1718.44	19.0958	1706.23	8.52698	1706.23	8.52698	101.304

## Sheet: DR3b-Igneous
Table DR3b. U-Pb geochronologic analyses of igneous zircons.
							Isotope ratios						Apparent ages (Ma)
Analysis	U	206Pb	U/Th	206Pb*	±	207Pb*	±	206Pb*	±	error	206Pb*	±	207Pb*	±	206Pb*	±	Best age	±	Conc
	(ppm)	204Pb		207Pb*	(%)	235U*	(%)	238U	(%)	corr.	238U*	(Ma)	235U	(Ma)	207Pb*	(Ma)	(Ma)	(Ma)	(%)
Tuff layer in Mancos Formation, Little Hatchet Mountains, New Mexico (see Table 4 for location).
11BQ18-07	1118.88	57830.4	3.93548	21.0124	3.2289	0.0973246	6.08234	0.0148319	5.15452	0.847457	94.9107	4.85636	94.3038	5.47763			94.9107	4.85636	NA
11BQ18-08	956.009	39528.5	2.87436	20.6515	3.9337	0.0995429	4.49773	0.0149094	2.18072	0.48485	95.403	2.06516	96.3543	4.13451			95.403	2.06516	NA
11BQ18-22	1218.06	34153.9	3.18231	21.05	2.7278	0.0978963	3.06787	0.0149457	1.4039	0.457613	95.6332	1.33268	94.8326	2.77762			95.6332	1.33268	NA
11BQ18-12	973.241	23024.8	4.00428	20.1495	4.56635	0.102457	4.69956	0.0149729	1.11096	0.236397	95.806	1.0565	99.0423	4.43477			95.806	1.0565	NA
11BQ18-16	729.144	23695.9	4.44451	21.1121	7.06698	0.097792	7.38026	0.0149739	2.12744	0.288261	95.8122	2.02328	94.7361	6.67561			95.8122	2.02328	NA
11BQ18-18	408.839	54918.1	3.08519	20.042	8.69774	0.103042	9.25646	0.014978	3.16724	0.342165	95.8386	3.01298	99.5806	8.78028			95.8386	3.01298	NA
11BQ18-19	758.441	32566.1	4.08087	20.8027	5.44104	0.0992944	5.97621	0.0149811	2.47188	0.41362	95.8579	2.35196	96.1249	5.48114			95.8579	2.35196	NA
11BQ18-06	1081.05	30673.7	3.12571	20.842	5.20103	0.0993834	5.29212	0.0150228	0.977658	0.184738	96.1232	0.932785	96.207	4.85767			96.1232	0.932785	NA
11BQ18-09	1147.66	48048.5	3.34071	20.4832	3.94531	0.10116	4.83667	0.0150282	2.79784	0.578464	96.1572	2.67036	97.847	4.5117			96.1572	2.67036	NA
11BQ18-25	730.829	18786.1	5.40568	21.1201	4.24941	0.0985811	4.48442	0.0151004	1.43266	0.319475	96.6158	1.37386	95.4658	4.08601			96.6158	1.37386	NA
11BQ18-17	843.344	42177.6	3.45523	20.3778	6.38624	0.10234	6.56153	0.0151253	1.50653	0.229601	96.7738	1.44704	98.9345	6.18546			96.7738	1.44704	NA
11BQ18-10	340.748	14167.5	2.6669	21.4072	16.7317	0.0975617	16.8353	0.0151474	1.86472	0.110762	96.9142	1.79366	94.5231	15.1961			96.9142	1.79366	NA
11BQ18-03	1005.45	43465.5	3.33307	20.4317	3.16606	0.102291	3.83258	0.015158	2.15979	0.563535	96.9817	2.07893	98.8893	3.61132			96.9817	2.07893	NA
11BQ18-14	1122.77	85603	3.75415	20.6501	2.84789	0.10159	3.59087	0.0152149	2.18721	0.609101	97.3431	2.1131	98.2428	3.3625			97.3431	2.1131	NA
11BQ18-24	920.654	42326.9	3.48887	20.5272	4.26307	0.102237	4.29693	0.0152209	0.538375	0.125293	97.3807	0.520333	98.8395	4.04692			97.3807	0.520333	NA
11BQ18-04	1187.08	80900.5	1.73027	20.3768	2.65597	0.1032	2.94209	0.0152515	1.26558	0.430165	97.5754	1.2256	99.7258	2.79455			97.5754	1.2256	NA
11BQ18-01	240.083	10735.8	1.78057	20.4479	19.76	0.102881	20.0721	0.0152574	3.52595	0.175664	97.6129	3.41585	99.4318	19.0142			97.6129	3.41585	NA
11BQ18-20	921.862	26745.2	3.39028	20.9946	3.43187	0.100225	3.54562	0.015261	0.890885	0.251263	97.6358	0.863269	96.9842	3.27959			97.6358	0.863269	NA
11BQ18-23	447.356	24047.3	2.95094	20.6371	8.80955	0.101977	8.89289	0.0152634	1.2146	0.136581	97.6507	1.17713	98.6	8.35629			97.6507	1.17713	NA
11BQ18-21	1315.02	51211.5	2.10339	20.7659	1.80353	0.101346	2.2762	0.0152636	1.38866	0.610076	97.6524	1.34584	98.0184	2.1268			97.6524	1.34584	NA
11BQ18-11	953.625	57337	4.42677	20.8125	5.96368	0.101388	6.08083	0.0153041	1.18789	0.19535	97.9093	1.15427	98.0563	5.68384			97.9093	1.15427	NA
11BQ18-13	888.592	21991.5	2.81581	20.9703	3.61704	0.101902	4.05241	0.0154984	1.82732	0.450922	99.1427	1.7978	98.5308	3.80528			99.1427	1.7978	NA
11BQ18-05	664.61	6304.07	4.25867	19.3971	6.25224	0.11017	6.52785	0.0154989	1.87677	0.287502	99.1458	1.8465	106.121	6.57779			99.1458	1.8465	NA
11BQ18-02	769.474	18284	3.0094	21.2232	5.77868	0.101944	6.22909	0.0156918	2.32559	0.373343	100.37	2.31612	98.5692	5.85142			100.37	2.31612	NA
11BQ18-15	1073.55	7107.43	1.62441	19.2818	5.39577	0.119463	7.04558	0.0167063	4.53054	0.643033	106.806	4.79902	114.585	7.63447			106.806	4.79902	NA
Tuff layer in Mancos Formation, Cookes Range, New Mexico (see Table 4 for location).
12BQ35-05	517.931	2663.36	2.01022	14.1686	34.2445	0.140151	34.3349	0.014402	2.49016	0.0725256	92.179	2.27907	133.178	42.8803			92.179	2.27907	NA
12BQ35-18	773.258	8810.77	1.78242	19.3585	13.1664	0.103547	13.4365	0.0145381	2.68042	0.199488	93.044	2.47606	100.045	12.8022			93.044	2.47606	NA
12BQ35-19	686.737	32347	1.72074	21.1123	3.20168	0.0949647	3.42572	0.0145411	1.21854	0.355702	93.0629	1.12586	92.1177	3.01679			93.0629	1.12586	NA
12BQ35-23	430.007	803.951	2.44747	16.9868	23.5793	0.118363	23.6726	0.0145822	2.09966	0.0886958	93.3244	1.94538	113.587	25.4448			93.3244	1.94538	NA
12BQ35-14	546.192	32271.9	1.80311	20.6601	3.73173	0.0974969	4.12308	0.014609	1.75327	0.425234	93.4945	1.62739	94.4632	3.71913			93.4945	1.62739	NA
12BQ35-12	267.99	20520	3.29516	20.8443	9.12641	0.0968931	9.51096	0.014648	2.67714	0.281479	93.7424	2.49146	93.9044	8.53087			93.7424	2.49146	NA
12BQ35-28	684.225	7233.54	1.96258	19.968	3.32869	0.101506	3.58567	0.0147002	1.33301	0.371759	94.0737	1.2449	98.1651	3.3551			94.0737	1.2449	NA
12BQ35-16	493.059	42475.9	2.29419	21.7693	4.67037	0.0931661	4.91518	0.0147096	1.53189	0.311664	94.1334	1.43154	90.4484	4.25348			94.1334	1.43154	NA
12BQ35-20	450.83	24620.9	2.24932	20.6679	5.45114	0.0982787	5.7171	0.0147317	1.72346	0.301457	94.2742	1.61295	95.1862	5.19465			94.2742	1.61295	NA
12BQ35-26	425.024	23112.6	3.05098	21.8409	3.81347	0.0931386	4.10248	0.0147536	1.51252	0.368685	94.4132	1.41761	90.4229	3.54921			94.4132	1.41761	NA
12BQ35-17	519.596	27480.1	2.34024	21.3545	2.91753	0.0956203	3.05973	0.0148094	0.921937	0.301314	94.7676	0.867307	92.7255	2.71146			94.7676	0.867307	NA
12BQ35-22	555.459	33261.6	2.15027	20.3942	5.54027	0.10027	5.63325	0.0148312	1.01927	0.180938	94.9058	0.960261	97.0252	5.2127			94.9058	0.960261	NA
12BQ35-11	964.485	34428.9	1.89196	20.3096	2.77458	0.100718	3.21573	0.0148357	1.62563	0.505524	94.9345	1.53198	97.4392	2.98775			94.9345	1.53198	NA
12BQ35-15	747.052	2588.25	1.77926	19.0261	10.9475	0.107589	11.3675	0.0148462	3.06144	0.269315	95.0015	2.88709	103.757	11.2125			95.0015	2.88709	NA
12BQ35-27	321.099	18199.4	3.26713	22.2019	7.39424	0.0922274	7.68477	0.0148507	2.09306	0.272364	95.0302	1.97445	89.5762	6.58891			95.0302	1.97445	NA
12BQ35-30	1203.17	39496.3	2.0116	20.5759	2.31621	0.0997003	2.71087	0.0148783	1.40854	0.51959	95.2053	1.33115	96.4997	2.49553			95.2053	1.33115	NA
12BQ35-03	499.893	25736.6	2.83103	20.6722	5.308	0.0996739	6.30253	0.014944	3.39808	0.539162	95.6225	3.22535	96.4753	5.80052			95.6225	3.22535	NA
12BQ35-08	272.746	14444.9	1.81946	21.434	9.12647	0.0985778	11.8936	0.0153243	7.62656	0.641234	98.0375	7.42032	95.4627	10.8369			98.0375	7.42032	NA
12BQ35-21	864.52	165103	0.720269	20.4065	2.42729	0.177129	2.72737	0.0262154	1.24371	0.456009	166.818	2.04811	165.587	4.16718			166.818	2.04811	NA
12BQ35-07	169.512	24745.8	1.56159	19.8028	6.033	0.297027	7.8151	0.0426601	4.96776	0.635662	269.3	13.1026	264.076	18.1743			269.3	13.1026	NA
12BQ35-13	177.503	16307.5	3.2912	14.2296	2.31531	1.4672	3.03756	0.151419	1.96625	0.647312	908.915	16.6689	916.976	18.3437	936.444	47.506	936.444	47.506	97.0603
12BQ35-25	138.749	23443.7	1.19338	10.4007	1.15143	3.61578	2.39819	0.272748	2.1037	0.877201	1554.74	29.0619	1553.01	19.0775	1550.64	21.6261	1550.64	21.6261	100.264
Tuff layer in Mancos Formation, San Ysidro, New Mexico (see Table 4 for location).
12BQ41-13	219.435	20406.7	0.656154	22.9004	11.4679	0.0897129	12.0203	0.0149004	3.60219	0.299675	95.3454	3.40925	87.2359	10.0485			95.3454	3.40925	NA
12BQ41-02	101.714	11185.2	0.677842	23.1334	28.178	0.089728	28.4594	0.0150545	3.99218	0.140276	96.3244	3.81685	87.2499	23.7983			96.3244	3.81685	NA
12BQ41-01	140.684	14845.4	0.539309	19.0748	13.2031	0.108925	13.5598	0.0150692	3.08979	0.227863	96.4174	2.95693	104.982	13.525			96.4174	2.95693	NA
12BQ41-14	302.611	31696.9	0.58783	21.7556	4.74448	0.0959353	5.45939	0.0151373	2.7009	0.494725	96.8501	2.59627	93.0174	4.85256			96.8501	2.59627	NA
12BQ41-16	280.967	60194.9	0.611482	20.0707	9.47856	0.104026	9.59344	0.0151427	1.48024	0.154297	96.8845	1.4234	100.486	9.17866			96.8845	1.4234	NA
12BQ41-11	382.203	30242.2	0.473741	20.9599	6.16337	0.099817	6.59606	0.0151737	2.34966	0.356221	97.0816	2.26399	96.6074	6.0786			97.0816	2.26399	NA
12BQ41-08	296.499	37561	0.582775	21.701	6.79089	0.0964109	6.91405	0.0151741	1.29917	0.187902	97.084	1.25183	93.4579	6.17334			97.084	1.25183	NA
12BQ41-09	202.987	17997.5	0.674138	19.5155	6.19042	0.107244	6.4575	0.0151792	1.83793	0.28462	97.1162	1.77155	103.441	6.35079			97.1162	1.77155	NA
12BQ41-15	982.4	125825	0.244003	20.5721	1.74639	0.101896	2.04137	0.0152032	1.05703	0.517803	97.2688	1.02044	98.5253	1.91677			97.2688	1.02044	NA
12BQ41-03	147.428	12657.2	0.877546	22.2493	12.9179	0.0945682	13.2022	0.0152602	2.7251	0.206413	97.6307	2.64049	91.75	11.5823			97.6307	2.64049	NA
12BQ41-07	113.357	9946.45	0.76935	22.2146	32.9493	0.0952217	33.0099	0.0153417	1.99782	0.0605219	98.1481	1.94597	92.356	29.1492			98.1481	1.94597	NA
12BQ41-04	265.855	19366.2	0.339613	21.2557	3.86322	0.0995925	4.31548	0.0153532	1.92325	0.445664	98.2213	1.87473	96.4002	3.96878			98.2213	1.87473	NA
12BQ41-10	160.993	12759	0.597888	21.578	12.8177	0.0981054	13.0532	0.0153534	2.4682	0.189088	98.222	2.40594	95.026	11.8417			98.222	2.40594	NA
12BQ41-06	319.008	71027.6	0.583281	20.956	6.3168	0.101528	6.64153	0.015431	2.05133	0.308864	98.715	2.00954	98.1862	6.21577			98.715	2.00954	NA
12BQ41-05	183.637	11082	0.516635	20.9157	12.9711	0.101791	13.154	0.0154411	2.1859	0.166178	98.7792	2.14276	98.428	12.3401			98.7792	2.14276	NA
12BQ41-12	718.586	52302.1	0.483297	20.9722	1.86785	0.102764	2.71949	0.0156309	1.97655	0.72681	99.9837	1.96098	99.3244	2.57321			99.9837	1.96098	NA
Tuff layer in Mancos Formation, Burro Mountains, New Mexico (see Table 4 for location).
12BQ47-07	412.484	31838.8	2.43132	21.5525	10.1671	0.0938735	10.5224	0.0146737	2.71111	0.257652	93.9054	2.52743	91.1054	9.16922			93.9054	2.52743	NA
12BQ47-02	499.876	48123.8	2.42019	20.4666	4.36119	0.0993291	4.91584	0.0147442	2.26836	0.461439	94.3531	2.12468	96.1568	4.51002			94.3531	2.12468	NA
12BQ47-08	979.404	73400.7	2.27131	20.8111	2.21266	0.0976908	2.69898	0.0147451	1.54551	0.572629	94.3591	1.44771	94.6426	2.43896			94.3591	1.44771	NA
12BQ47-09	275.872	72396.8	1.52114	21.5378	5.78391	0.0946629	6.19245	0.014787	2.21196	0.357203	94.6254	2.07779	91.8378	5.43746			94.6254	2.07779	NA
12BQ47-05	229.366	14289.4	1.80373	20.698	10.3682	0.0986199	10.7121	0.0148044	2.69266	0.251366	94.7358	2.53226	95.5016	9.76416			94.7358	2.53226	NA
12BQ47-01	710.711	46747.2	2.25801	20.8118	2.89339	0.0986263	4.13807	0.0148868	2.95836	0.714914	95.2591	2.79739	95.5075	3.77201			95.2591	2.79739	NA
12BQ47-16	533.778	57188.7	2.26959	20.6417	4.043	0.09959	4.50725	0.0149094	1.99235	0.442032	95.4026	1.88676	96.3978	4.14504			95.4026	1.88676	NA
12BQ47-12	708.34	72402.8	2.34542	20.4457	2.38687	0.101086	2.7037	0.0149896	1.26998	0.469719	95.9123	1.20905	97.7783	2.52034			95.9123	1.20905	NA
12BQ47-14	602.256	22759.5	1.85796	20.8659	2.89765	0.0991074	3.52769	0.0149983	2.01201	0.570349	95.9672	1.91657	95.9521	3.22989			95.9672	1.91657	NA
12BQ47-06	877.569	170052	1.97935	20.9067	2.08329	0.0989506	2.41813	0.0150038	1.22769	0.507704	96.0026	1.16988	95.8072	2.2108			96.0026	1.16988	NA
12BQ47-15	799.01	50412.5	2.16327	20.7378	3.679	0.0998879	3.85567	0.0150236	1.15375	0.299236	96.1283	1.10086	96.6728	3.55546			96.1283	1.10086	NA
12BQ47-04	149.491	3503.41	1.41598	21.149	17.9245	0.0984913	18.5856	0.0151073	4.91266	0.264327	96.6593	4.71312	95.3827	16.9218			96.6593	4.71312	NA
12BQ47-11	555.062	46459.9	2.1354	21.4046	4.08877	0.0982606	4.63539	0.0152541	2.18377	0.471107	97.5917	2.11513	95.1695	4.21108			97.5917	2.11513	NA
12BQ47-10	822.898	26160.6	2.15389	20.9549	1.98836	0.100416	2.65924	0.0152612	1.76579	0.664018	97.6368	1.71107	97.1604	2.46397			97.6368	1.71107	NA
12BQ47-17	646.242	83653.2	2.68779	20.6576	4.01582	0.102594	4.4596	0.015371	1.93938	0.434878	98.3337	1.89259	99.1682	4.21343			98.3337	1.89259	NA
12BQ47-13	680.805	49672	2.53441	20.883	2.56927	0.102577	2.81799	0.015536	1.15755	0.410771	99.3818	1.14157	99.1523	2.66202			99.3818	1.14157	NA
12BQ47-03	185.106	60177.1	1.06901	19.567	3.26574	0.276358	3.69242	0.0392189	1.72306	0.466647	247.989	4.19185	247.764	8.11801			247.989	4.19185	NA
Tuff layer in Mancos Formation, Cookes Range, New Mexico (see Table 4 for location).
19BQ44-22	616.993	11793.3	2.88945	21.1762	1.58193	0.0924171	1.96908	0.0142	1.1725	0.595457	90.8953	1.05827	89.7526	1.69145			90.8953	1.05827	NA
19BQ44-26	793.367	16562	4.39879	20.8717	0.933397	0.0941089	1.40431	0.014252	1.04922	0.747141	91.2259	0.950419	91.3238	1.22649			91.2259	0.950419	NA
19BQ44-25	400.47	10952.9	3.95418	20.6661	1.67931	0.0952314	2.19827	0.01428	1.41856	0.645307	91.4035	1.28746	92.365	1.94082			91.4035	1.28746	NA
19BQ44-9	625.851	13986.7	3.68067	20.8481	0.956205	0.0944521	1.26936	0.0142878	0.83484	0.657684	91.4532	0.758098	91.6422	1.11232			91.4532	0.758098	NA
19BQ44-39	868.977	17716.1	4.90991	20.6087	1.03183	0.0965491	1.51263	0.0144373	1.10607	0.731222	92.4034	1.01476	93.5859	1.35233			92.4034	1.01476	NA
19BQ44-10	870.4	33460.4	4.29692	20.5092	0.984058	0.0972305	1.41219	0.014469	1.01288	0.717237	92.6051	0.931271	94.2167	1.27066			92.6051	0.931271	NA
19BQ44-12	806.561	8161.99	3.70184	21.8115	1.07379	0.0914774	1.59572	0.0144773	1.18038	0.739715	92.6575	1.08588	88.8787	1.35796			92.6575	1.08588	NA
19BQ44-33	847.356	38645.8	3.58811	20.7656	1.10345	0.0961163	1.57304	0.014482	1.12109	0.71269	92.6877	1.03168	93.185	1.40058			92.6877	1.03168	NA
19BQ44-24	630.899	12214.4	5.55162	20.9464	1.26886	0.0953609	1.82438	0.0144933	1.31087	0.718526	92.7595	1.20725	92.4851	1.61272			92.7595	1.20725	NA
19BQ44-6	789.088	14639.3	3.75987	20.8517	0.984424	0.0960624	1.60974	0.0145339	1.27365	0.791212	93.0174	1.17621	93.1352	1.43253			93.0174	1.17621	NA
19BQ44-38	587.479	24083.9	4.77641	20.9127	1.07229	0.0957826	1.47339	0.014534	1.01047	0.685815	93.0179	0.933169	92.8759	1.3077			93.0179	0.933169	NA
19BQ44-27	386.726	5170.9	3.70467	21.7114	2.8087	0.0926093	3.13961	0.0145891	1.40297	0.446861	93.3682	1.30049	89.9312	2.70207			93.3682	1.30049	NA
19BQ44-2	619.935	5323.45	3.57328	21.5163	0.838097	0.0938518	1.30099	0.014652	0.995075	0.764859	93.7678	0.926307	91.0851	1.13341			93.7678	0.926307	NA
19BQ44-32	978.503	7956.55	3.85729	21.3274	0.989501	0.0947853	1.53283	0.0146679	1.17066	0.763727	93.8684	1.09092	91.9513	1.34752			93.8684	1.09092	NA
19BQ44-28	494.031	11904.2	3.98676	20.6903	1.40364	0.0977639	1.77471	0.0146769	1.086	0.611931	93.9257	1.01264	94.7102	1.60483			93.9257	1.01264	NA
19BQ44-31	390.43	184382	3.65556	21.2495	1.42034	0.095237	2.00318	0.0146839	1.41258	0.705168	93.9703	1.31778	92.3702	1.76867			93.9703	1.31778	NA
19BQ44-21	598.19	6862.7	5.50465	21.4945	1.99204	0.0947969	2.45568	0.0147846	1.43602	0.584774	94.6097	1.34869	91.9621	2.15905			94.6097	1.34869	NA
19BQ44-30	318.602	4731.15	3.1989	21.8859	2.79448	0.0931454	3.12457	0.0147915	1.39779	0.447356	94.6539	1.3134	90.4292	2.70337			94.6539	1.3134	NA
19BQ44-14	453.543	244322	3.40751	20.4799	1.3679	0.0995732	1.75247	0.0147965	1.09544	0.625084	94.6854	1.02964	96.3823	1.61138			94.6854	1.02964	NA
19BQ44-36	638.769	51279.9	2.81853	20.54	1.12438	0.0992941	1.63258	0.0147983	1.18368	0.725035	94.6971	1.11272	96.1245	1.49732			94.6971	1.11272	NA
19BQ44-23	466.222	18961.7	2.82379	20.6251	1.33067	0.0989798	1.89672	0.0148126	1.35162	0.712609	94.7877	1.2718	95.8342	1.73457			94.7877	1.2718	NA
19BQ44-29	737.776	5402.87	4.32894	21.5931	1.07772	0.0945762	1.55531	0.0148178	1.12139	0.721005	94.8211	1.05553	91.7574	1.36453			94.8211	1.05553	NA
19BQ44-11	856.066	10219.1	3.40691	21.0784	1.44374	0.0969506	1.91611	0.0148278	1.2598	0.657477	94.8845	1.1866	93.9576	1.71955			94.8845	1.1866	NA
19BQ44-4	341.923	16892.5	4.09076	20.3984	1.40835	0.100334	2.08056	0.0148502	1.53143	0.736068	95.0265	1.4446	97.0847	1.92635			95.0265	1.4446	NA
19BQ44-35	410.644	6943.25	4.78818	21.5558	2.00671	0.0950202	2.30766	0.0148617	1.13948	0.493781	95.0996	1.07569	92.1692	2.03328			95.0996	1.07569	NA
19BQ44-3	596.538	4424.95	3.30327	22.2619	1.12819	0.0920072	1.562	0.0148618	1.0803	0.691613	95.1005	1.01983	89.3715	1.33632			95.1005	1.01983	NA
19BQ44-13	890.064	13932.5	3.86445	20.936	1.06263	0.0978821	1.62397	0.0148691	1.22804	0.756201	95.1468	1.15986	94.8195	1.47013			95.1468	1.15986	NA
19BQ44-34	836.808	54938.7	1.87056	20.9988	0.892481	0.0976474	1.52259	0.014878	1.23359	0.810194	95.2031	1.16579	94.6023	1.37534			95.2031	1.16579	NA
19BQ44-0	508.521	5206.89	3.01958	21.081	1.68491	0.0973081	2.02238	0.0148843	1.11852	0.553074	95.2432	1.05749	94.2885	1.82101			95.2432	1.05749	NA
19BQ44-8	464.603	7745.99	4.16389	21.409	1.62846	0.0964668	2.05857	0.0149852	1.25929	0.611732	95.8841	1.19852	93.5097	1.83898			95.8841	1.19852	NA
19BQ44-19	1189.5	20497.1	4.05263	21.1918	1.01174	0.0976503	1.57025	0.0150151	1.20086	0.764755	96.074	1.14516	94.605	1.41843			96.074	1.14516	NA
19BQ44-17	495.068	14091	2.97754	21.3546	1.15651	0.0969337	1.63658	0.0150195	1.15797	0.707553	96.1018	1.10458	93.942	1.46846			96.1018	1.10458	NA
19BQ44-1	513.598	3972.94	3.11937	21.9476	1.30945	0.0944641	1.9663	0.0150432	1.46686	0.746001	96.2527	1.40141	91.6534	1.72324			96.2527	1.40141	NA
19BQ44-18	654.004	15703.4	3.2228	20.9396	1.13094	0.0992629	1.65801	0.0150814	1.21242	0.731252	96.4954	1.16122	96.0957	1.5202			96.4954	1.16122	NA
19BQ44-16	563.255	14102.9	3.38216	21.27	1.17031	0.0980389	1.64717	0.0151305	1.15911	0.703699	96.8069	1.11372	94.9645	1.49331			96.8069	1.11372	NA
19BQ44-20	483.586	7826.4	3.52517	21.4224	1.2839	0.097457	1.76647	0.0151484	1.21326	0.686828	96.9209	1.16711	94.4262	1.5928			96.9209	1.16711	NA
19BQ44-5	874.948	10515	3.00724	18.5784	2.19241	0.112696	2.49042	0.0151917	1.18132	0.474347	97.1954	1.13958	108.429	2.56116			97.1954	1.13958	NA
19BQ44-7	449.549	15733.1	2.49846	20.9498	1.31808	0.10049	1.80891	0.0152753	1.23888	0.684877	97.7263	1.20158	97.2285	1.6772			97.7263	1.20158	NA
19BQ44-15	338.851	23459.7	4.11028	20.2981	1.46108	0.104124	1.78052	0.0153354	1.01759	0.571515	98.1079	0.99078	100.576	1.70494			98.1079	0.99078	NA
19BQ44-37	113.006	31540.4	3.77534	18.3962	1.1001	0.344116	1.67411	0.0459327	1.26192	0.753783	289.502	3.57246	300.286	4.35197			289.502	3.57246	NA
Tuff layer in Mancos Formation, Cookes Range, New Mexico (see Table 4 for location).
19BQ45-35	895.615	7435.84	3.72331	19.5836	2.23772	0.100546	2.67166	0.0142872	1.45959	0.546323	91.4497	1.32537	97.2807	2.47839			91.4497	1.32537	NA
19BQ45-4	655.179	1020.08	0.873357	9.94873	14.105	0.199769	14.1894	0.0144206	1.54455	0.108853	92.2972	1.41542	184.931	23.9941			92.2972	1.41542	NA
19BQ45-30	956.226	34573.1	4.7259	20.8034	0.911503	0.0959409	1.45157	0.0144819	1.1297	0.778261	92.6867	1.03959	93.0226	1.29029			92.6867	1.03959	NA
19BQ45-32	942.663	13667.2	4.18026	21.0416	0.976789	0.0950289	1.50775	0.0145085	1.14856	0.76177	92.8556	1.05885	92.1772	1.32858			92.8556	1.05885	NA
19BQ45-15	1182.24	9064.93	6.1913	21.1877	1.14839	0.0944764	1.91201	0.0145243	1.52872	0.799535	92.9561	1.41084	91.6648	1.67586			92.9561	1.41084	NA
19BQ45-6	941.178	31853.6	2.79282	20.4511	0.879739	0.0981164	1.27369	0.0145595	0.921058	0.723141	93.1799	0.852068	95.0361	1.15555			93.1799	0.852068	NA
19BQ45-8	1172.86	20040.2	3.76838	21.3072	0.79192	0.0944668	1.53766	0.0146047	1.31805	0.857181	93.4672	1.22306	91.6559	1.34762			93.4672	1.22306	NA
19BQ45-33	732.891	8404.37	4.41539	21.5097	1.38044	0.0937435	1.7288	0.0146307	1.04073	0.601997	93.632	0.967413	90.9847	1.50453			93.632	0.967413	NA
19BQ45-34	382.714	4379.2	3.28862	22.2716	2.10052	0.0907212	2.59991	0.0146605	1.5321	0.589291	93.8216	1.42704	88.175	2.19576			93.8216	1.42704	NA
19BQ45-37	272.888	4534.31	3.39672	22.076	1.30119	0.0915709	1.77702	0.0146678	1.21025	0.681054	93.8681	1.1278	88.9657	1.51366			93.8681	1.1278	NA
19BQ45-17	215.844	2135.58	3.68255	24.1892	2.62785	0.0838658	2.90065	0.0147195	1.22808	0.423382	94.1967	1.1484	81.773	2.27895			94.1967	1.1484	NA
19BQ45-19	928.101	12938.8	3.60667	21.3276	1.4948	0.0952577	1.9445	0.0147411	1.24365	0.639571	94.3336	1.16463	92.3894	1.7172			94.3336	1.16463	NA
19BQ45-39	832.98	23616.4	2.95604	21.0474	1.0123	0.0965528	1.50301	0.0147452	1.11099	0.739173	94.36	1.04069	93.5893	1.34378			94.36	1.04069	NA
19BQ45-18	797.646	9577.34	2.81958	18.7654	2.36699	0.108442	2.74461	0.0147654	1.38934	0.506205	94.4878	1.30318	104.54	2.72645			94.4878	1.30318	NA
19BQ45-2	1246.6	12226.6	2.48275	21.1302	1.18246	0.0963804	1.52251	0.0147768	0.959085	0.629935	94.5602	0.900294	93.4297	1.359			94.5602	0.900294	NA
19BQ45-1	761.98	8942.46	4.21457	21.2126	1.02698	0.0961201	1.59844	0.0147943	1.22488	0.766293	94.6719	1.15114	93.1886	1.42326			94.6719	1.15114	NA
19BQ45-22	871.739	24057.7	4.68913	21.019	0.987603	0.0970741	1.57324	0.0148048	1.22464	0.778416	94.7383	1.15172	94.0719	1.41349			94.7383	1.15172	NA
19BQ45-23	993.152	11380.5	3.54652	20.9153	1.12873	0.0975614	1.48218	0.0148057	0.960629	0.648121	94.7442	0.903485	94.5229	1.33776			94.7442	0.903485	NA
19BQ45-38	949.386	22532.2	4.52536	21.0976	1.09447	0.0967226	1.60966	0.0148064	1.18032	0.733272	94.7485	1.11016	93.7465	1.44144			94.7485	1.11016	NA
19BQ45-11	638.76	16892.3	5.66682	20.9993	0.97213	0.097746	1.56836	0.0148933	1.23074	0.78473	95.3004	1.16427	94.6936	1.41799			95.3004	1.16427	NA
19BQ45-5	417.175	27033.3	4.43057	19.9235	2.08673	0.103147	2.46432	0.0149111	1.31088	0.531944	95.4135	1.24154	99.677	2.33965			95.4135	1.24154	NA
19BQ45-36	804.286	1.06311e+06	4.36055	20.8238	0.973986	0.0987314	1.34497	0.0149177	0.927528	0.689625	95.4557	0.878855	95.6046	1.22718			95.4557	0.878855	NA
19BQ45-0	870.981	45844.1	4.33163	20.7507	1.09619	0.0991397	1.59484	0.0149268	1.1584	0.726342	95.5134	1.09827	95.9819	1.46063			95.5134	1.09827	NA
19BQ45-31	578.434	4194.76	4.02709	22.5664	0.971202	0.0911885	1.59132	0.014931	1.26059	0.792162	95.54	1.19548	88.6099	1.3503			95.54	1.19548	NA
19BQ45-3	625.92	4516.47	5.00763	22.1399	1.36813	0.0929664	1.79227	0.0149344	1.15779	0.645988	95.5617	1.09824	90.2629	1.54794			95.5617	1.09824	NA
19BQ45-28	440.273	29407.4	4.924	20.9349	1.1461	0.0986843	1.62375	0.0149902	1.15023	0.708379	95.9157	1.09508	95.5611	1.48089			95.9157	1.09508	NA
19BQ45-16	555.967	15902.7	4.7408	21.233	1.17794	0.0973107	1.66801	0.014992	1.18099	0.708022	95.9274	1.12451	94.2909	1.50197			95.9274	1.12451	NA
19BQ45-24	402.026	3904.37	4.73079	19.7392	3.20298	0.104887	3.33522	0.0150225	0.929862	0.2788	96.1209	0.887161	101.278	3.21486			96.1209	0.887161	NA
19BQ45-7	685.768	7063.28	5.41746	21.6379	1.26792	0.09602	1.59791	0.0150753	0.972471	0.608589	96.4563	0.931027	93.0958	1.42143			96.4563	0.931027	NA
19BQ45-27	736.29	12699.8	3.86453	21.334	1.14228	0.097486	1.66581	0.0150904	1.21249	0.727864	96.5525	1.16196	94.4531	1.50245			96.5525	1.16196	NA
19BQ45-9	761.977	30988.7	4.54547	20.7514	1.1145	0.10039	1.63187	0.0151156	1.19201	0.730457	96.7124	1.14422	97.1365	1.51168			96.7124	1.14422	NA
19BQ45-14	828.624	42400.6	4.25802	20.9862	1.0244	0.0992921	1.59836	0.0151195	1.22693	0.767619	96.7369	1.17803	96.1227	1.46591			96.7369	1.17803	NA
19BQ45-13	745.499	168347	4.84535	20.7284	1.21601	0.100768	1.7466	0.0151557	1.25376	0.717832	96.9667	1.20664	97.4848	1.62349			96.9667	1.20664	NA
19BQ45-29	697.232	11631.1	3.78499	20.2319	1.19761	0.103671	1.62149	0.0152188	1.09314	0.674158	97.3677	1.05637	100.159	1.54655			97.3677	1.05637	NA
19BQ45-21	725.996	15529.8	5.70477	21.0374	1.17442	0.0997827	1.83386	0.0152312	1.40847	0.768034	97.4465	1.36218	96.5757	1.68945			97.4465	1.36218	NA
19BQ45-12	318.283	4554.63	4.56121	17.9899	3.33955	0.120783	3.59543	0.0157661	1.33212	0.370505	100.842	1.33288	115.782	3.9343			100.842	1.33288	NA
19BQ45-10	201.425	5799.72	2.27196	21.4643	2.18176	0.104725	2.66411	0.0163101	1.52886	0.573873	104.294	1.58167	101.129	2.56437			104.294	1.58167	NA
19BQ45-20	166.844	8523.18	2.94182	19.4363	1.07397	0.351485	1.53818	0.0495687	1.10117	0.715892	311.873	3.3525	305.838	4.06195			311.873	3.3525	NA
19BQ45-26	64.5433	22052.1	2.33298	17.986	1.59334	0.521873	1.8997	0.0681064	1.03447	0.544544	424.737	4.25217	426.401	6.61467	435.387	35.5019	424.737	4.25217	97.5539
19BQ45-25	167.22	37680.7	4.99693	12.874	0.868889	2.08406	1.4739	0.194675	1.19056	0.807757	1146.65	12.5063	1143.57	10.1135	1137.76	17.2708	1137.76	17.2708	100.782
Notes for analyses:
Best age is determined from 206Pb/238U age for analyses with 206Pb/238U age < ~1000 Ma and from 206Pb/207Pb age for analyses with 206Pb/238Uage > ~1000 Ma.
Concordance is based on 206Pb/238U age / 206Pb/207Pb age, with 100% = concordant. Value is not reported for 206Pb/238U ages <500 Ma because of large uncertainty in 206Pb/207Pb age.
All uncertainties are reported at the 1-sigma level, and include only measurement errors.
Systematic errors are shown as 206Pb/238U uncertainty, 206Pb/207Pb uncertainty to the right of each sample (in %, at 2-sigma level).
U concentration and U/Th are calibrated relative to Sri Lanka zircon and are accurate to ~20%.
Common Pb correction is from 204Pb, with composition interpreted from Stacey and Kramers (1975).
Uncertainties of 1.5 for 206Pb/ 204Pb, 0.3 for 207Pb/ 204Pb, and 2.0 for 208Pb/ 204Pb are applied to common Pb composition.
U/Pb and 206Pb/207Pb fractionation is calibrated relative to fragments of a large Sri Lanka zircon of 563.5 ± 3.2 Ma (2-sigma).
U decay constants and composition as follows: 238U = 9.8485 x 10-10, 235U = 1.55125 x 10-10, 238U/235U = 137.88
Analytical methods as described by Gehrels et al. (2008).
Gehrels, G.E., Valencia, V.A., Ruiz, J., 2008. Enhanced precision, accuracy, efficiency, and spatial resolution of U-Pb ages by laser ablation-multicollector-inductively coupled plasma mass spectrometry:
Geochemistry Geophysics Geosystems 9 (Q03017), 13.
Stacey, J.S., and Kramers, J.D., 1975, Approximation of terrestrial lead isotopic evolution by a two-stage model: Earth and Planetary Science Letters, v. 26, p. 207-221.
